# Supplementary material for: Biologically potent organotin(iv) complexes ofN-acetylated β-amino acids with spectroscopic, X-ray powder diffraction and molecular docking studies
Source: Royal Society of Chemistry journal article supplement (doi:10.1039/d2ra06718h), 2023-01-01
Supplement: d2ra06718h1.pdf [file d2ra06718h1.pdf]

## Synthesis, Spectroscopic, X-Ray Powder Diffraction and Molecular Docking Studies of Biologically Potent Organotin(IV) Complexes with N-Acetylated $\beta$ -Amino Acids: An *In Vitro* and *In Vivo* Antidiabetic Activity

Nagina Naveed Riaz <sup>a,b</sup>, Muhammad Mahboob Ahmed <sup>\*a</sup>, Muhammad Kashif <sup>c</sup>, Muhammad Sajid <sup>a</sup>, Muhammad Ali <sup>d</sup>, Khalid Mahmood<sup>a</sup>

<sup>a</sup> Institute of Chemical Sciences, Bahauddin Zakariya University, Multan, Pakistan

<sup>b</sup> Department of Chemistry, Division of Science & Technology, University of Education, Lahore, Pakistan

<sup>c</sup> Department of Chemistry, Emerson University, Multan, Pakistan

<sup>d</sup> School of Materials Science and Engineering, University of Science and Technology of China, 96 Jinzhai Road, Baohe District, Hefei, 230026, PR China

\*[mahboobahmed@bzu.edu.pk](mailto:mahboobahmed@bzu.edu.pk)

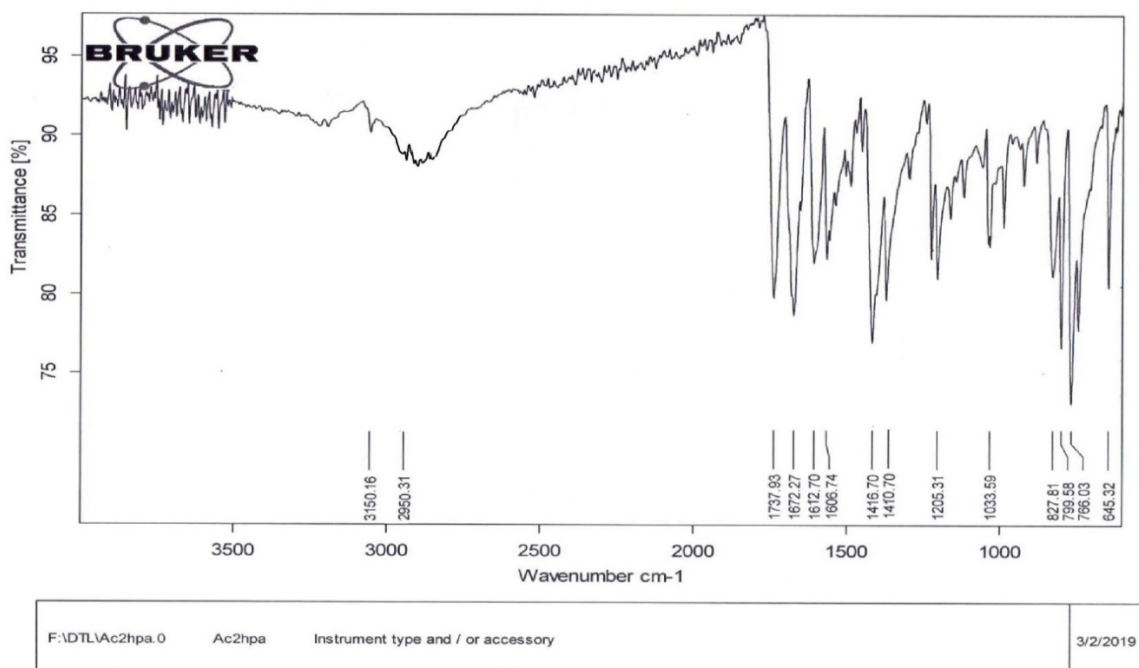

**Fig. S1** FTIR spectrum of 3-Acetylamino-3(2-hydroxyphenyl) propanoic acid **L<sub>1</sub>**

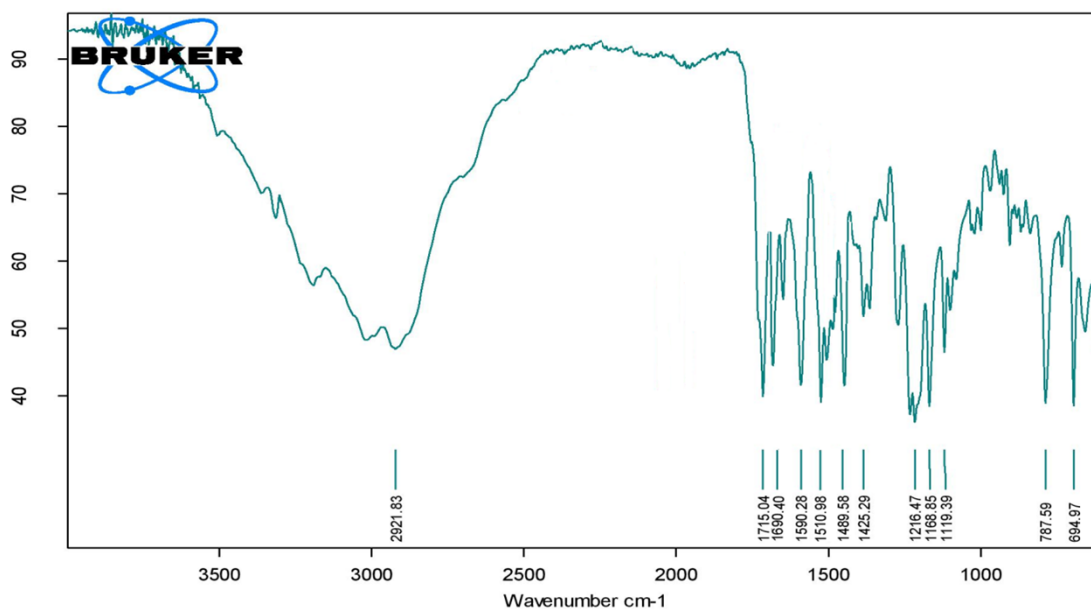

|                 |        |                                    |          |
|-----------------|--------|------------------------------------|----------|
| F:\DTL\Ac3hpa.0 | Ac3hpa | Instrument type and / or accessory | 3/2/2019 |
|-----------------|--------|------------------------------------|----------|

**Fig. S2** FTIR spectrum of the 3-Acetylamino-3(3-hydroxyphenyl) propanoic acid **L<sub>2</sub>**

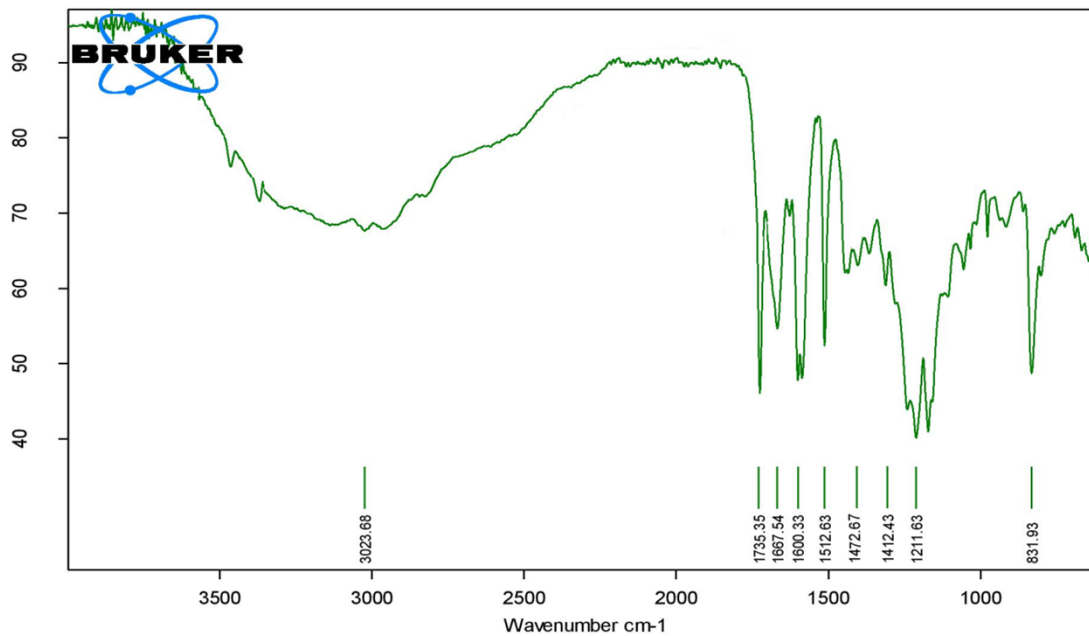

|                 |        |                                    |          |
|-----------------|--------|------------------------------------|----------|
| F:\DTL\Ac4hpa.0 | Ac4hpa | Instrument type and / or accessory | 3/2/2019 |
|-----------------|--------|------------------------------------|----------|

**Fig. S3** FTIR spectrum of 3-Acetylamino-3(4-hydroxyphenyl) propanoic acid **L<sub>3</sub>**

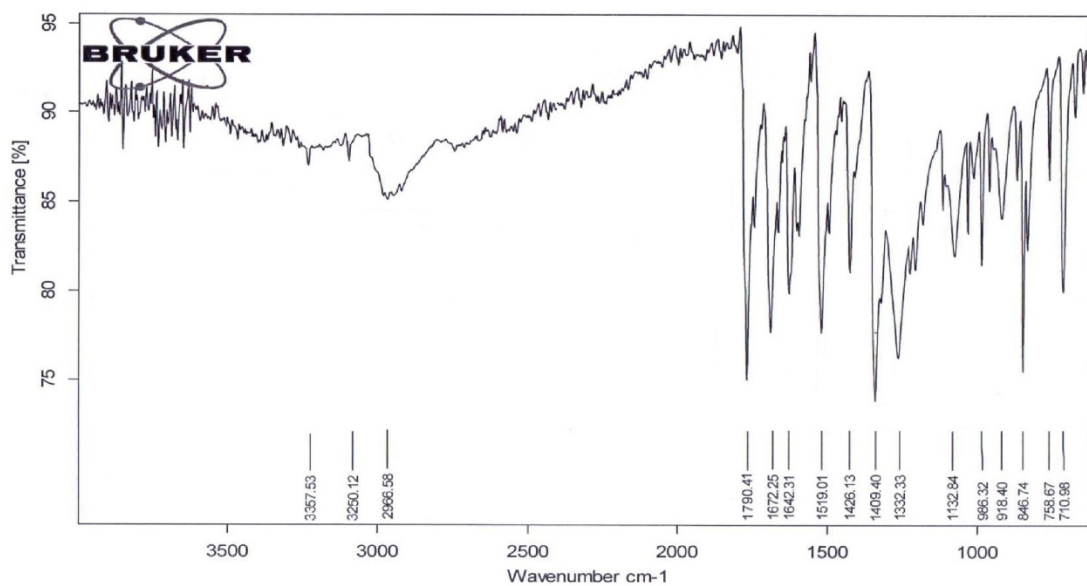

|                 |        |                                    |          |
|-----------------|--------|------------------------------------|----------|
| F:\DTL\Ac2Npa.0 | Ac2Npa | Instrument type and / or accessory | 3/2/2019 |
|-----------------|--------|------------------------------------|----------|

**Fig. S4** FTIR spectrum of 3-Acetylamino-3(2-nitrophenyl) propanoic acid **L<sub>4</sub>**

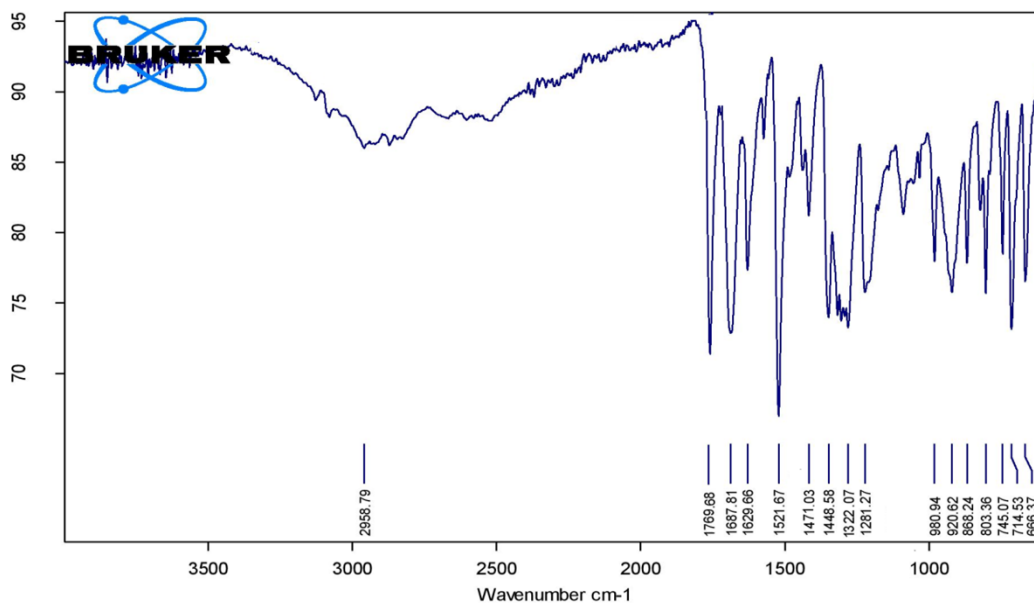

|                 |        |                                    |          |
|-----------------|--------|------------------------------------|----------|
| F:\DTL\Ac3npa.0 | Ac3npa | Instrument type and / or accessory | 3/2/2019 |
|-----------------|--------|------------------------------------|----------|

**Fig. S5** FTIR spectrum of the 3-Acetylamino-3(3-nitrophenyl) propanoic acid **L<sub>5</sub>**

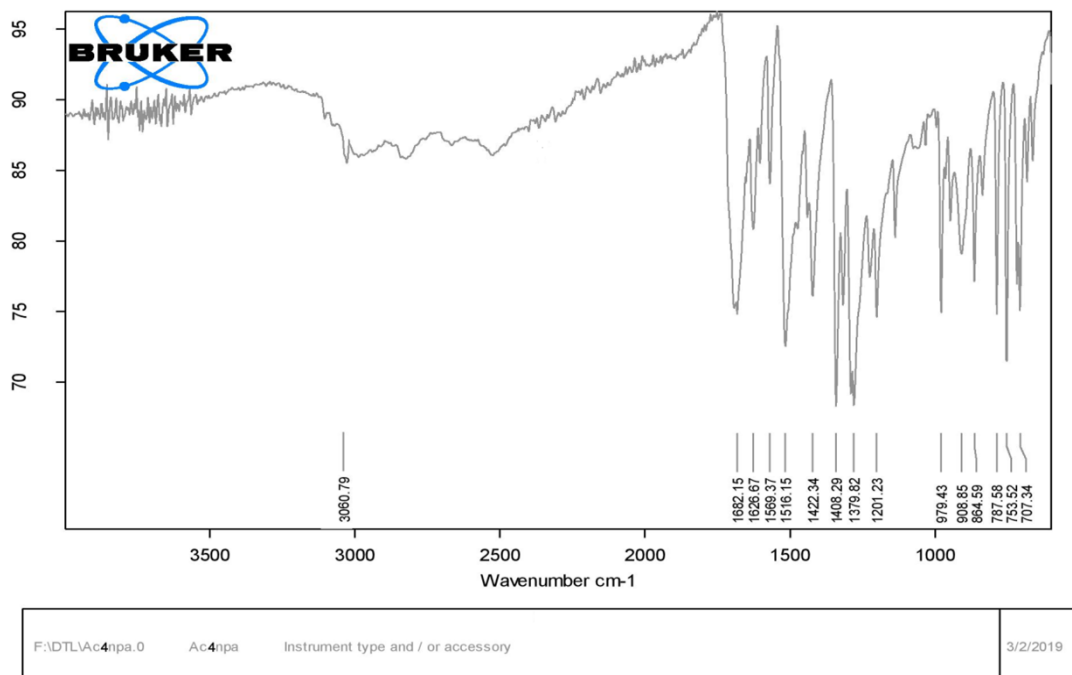

Fig. S6 FTIR spectrum of 3-Acetylamino-3(4-nitrophenyl) propanoic acid **L<sub>6</sub>**

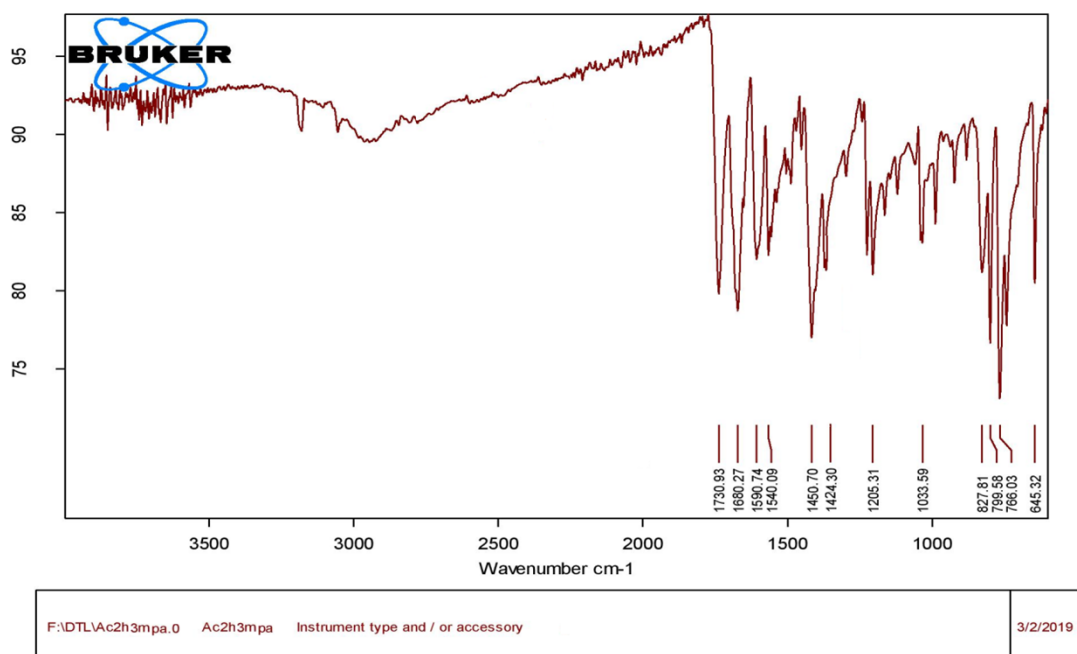

Fig. S7 FTIR spectrum of 3-Acetylamino-3(3-hydroxy-2-methoxyphenyl) propanoic acid **L<sub>7</sub>**

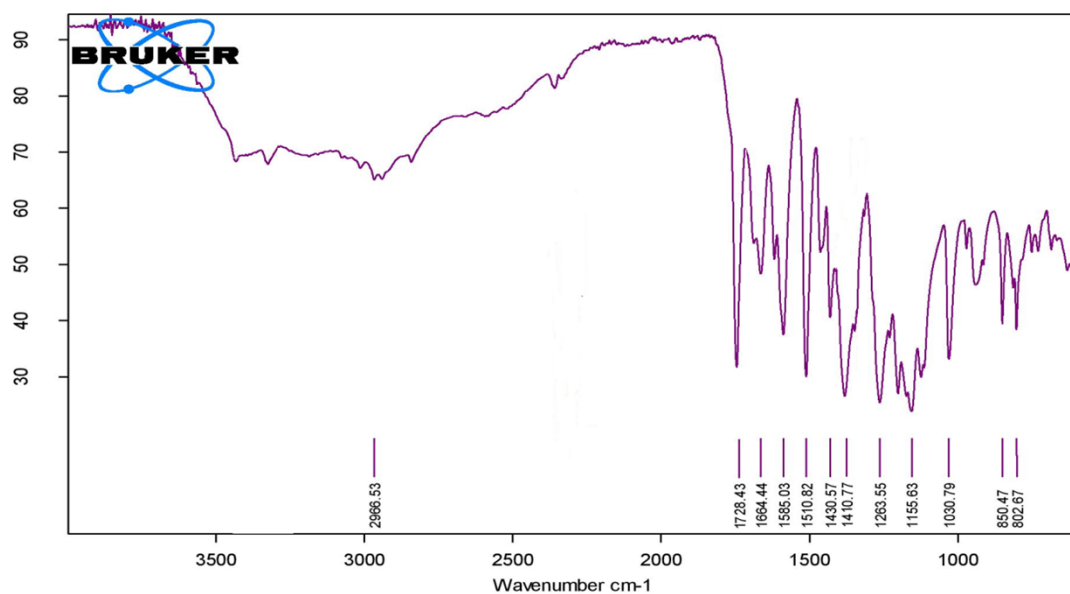

|                   |          |                                    |          |
|-------------------|----------|------------------------------------|----------|
| F:\DTL\Ac4h3mpa.0 | Ac4h3mpa | Instrument type and / or accessory | 3/2/2019 |
|-------------------|----------|------------------------------------|----------|

Fig. S8 FTIR spectrum of 3-Acetylaminopropanoic acid **L**<sub>8</sub>

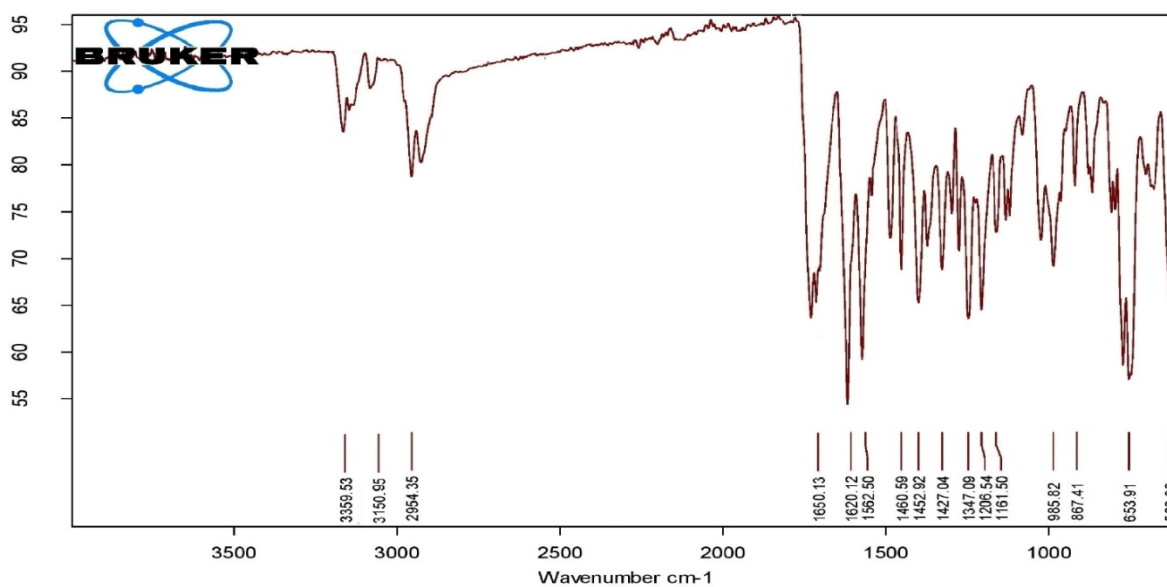

|                      |             |                                    |            |
|----------------------|-------------|------------------------------------|------------|
| F:\DTL\BU2snoAC2HM.0 | BU2snoAC2HM | Instrument type and / or accessory | 10/12/2019 |
|----------------------|-------------|------------------------------------|------------|

Fig. S9 FTIR spectrum of the dibutyltin(IV) oxide monomer complex (**1**) with 3-Acetylaminopropanoic acid **L**<sub>1</sub>

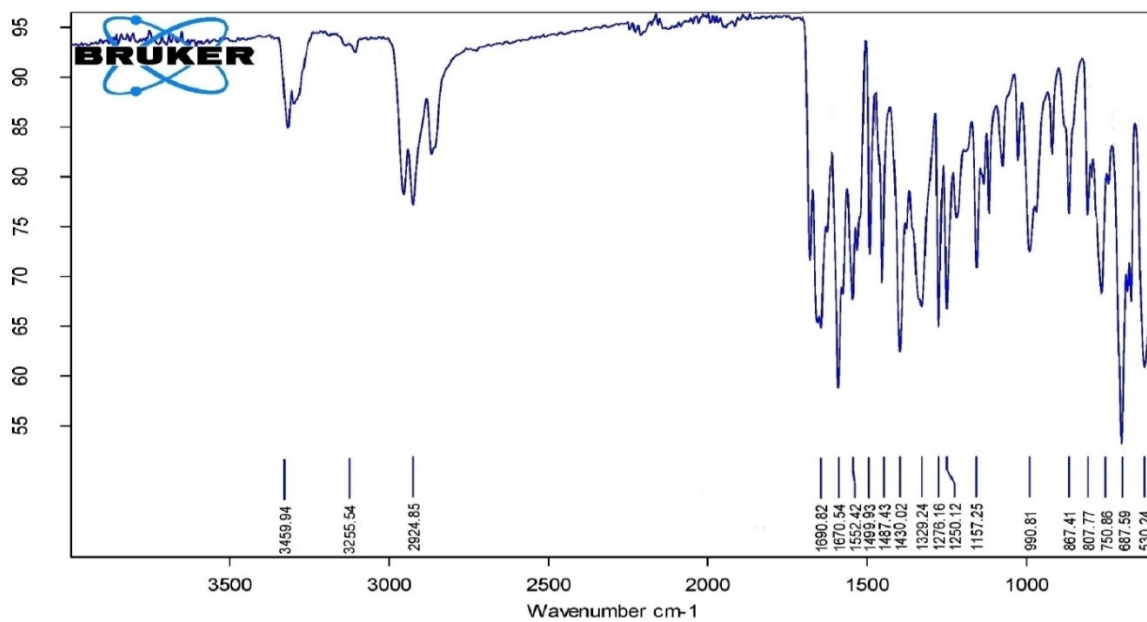

|                      |             |                                    |            |
|----------------------|-------------|------------------------------------|------------|
| F:\DTL\BU2SnOAC2HD.0 | BU2SnOAC2HD | Instrument type and / or accessory | 10/12/2019 |
|----------------------|-------------|------------------------------------|------------|

**Fig. S10** FTIR spectrum of the dibutyltin(IV) oxide dimer complex (**2**) with 3-Acetylamino-3(2-hydroxyphenyl) propanoic acid **L**<sub>1</sub>

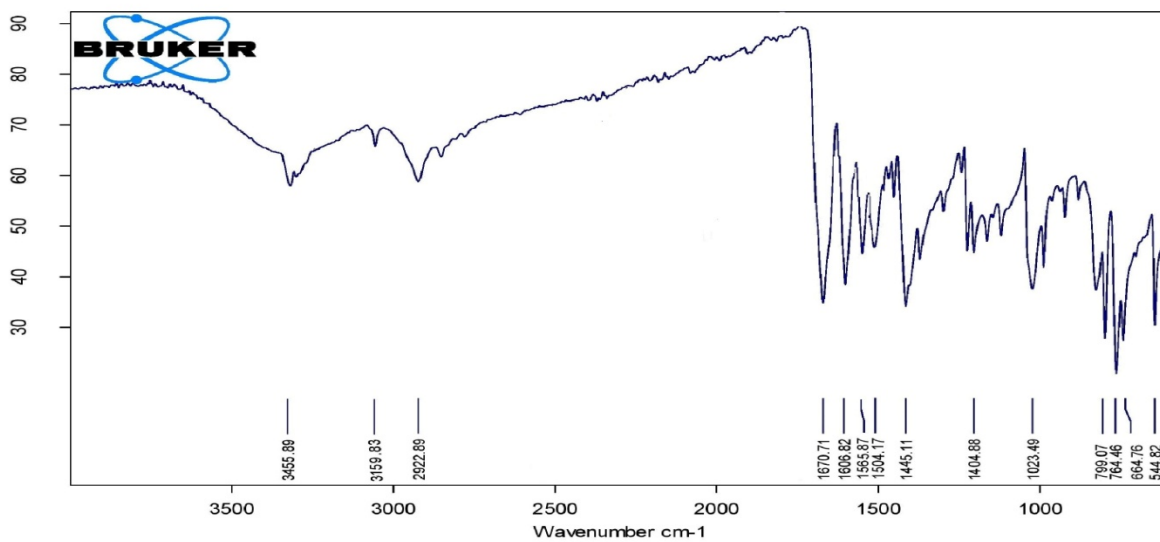

|                       |              |                                    |            |
|-----------------------|--------------|------------------------------------|------------|
| F:\DTL\Bu2sncl2Ac2H.0 | Bu2sncl2Ac2H | Instrument type and / or accessory | 10/12/2019 |
|-----------------------|--------------|------------------------------------|------------|

**Fig. S11** FTIR spectrum of the dibutyltin(IV) dichloride complex (**3**) with 3-Acetylamino-3(2-hydroxyphenyl) propanoic acid **L**<sub>1</sub>

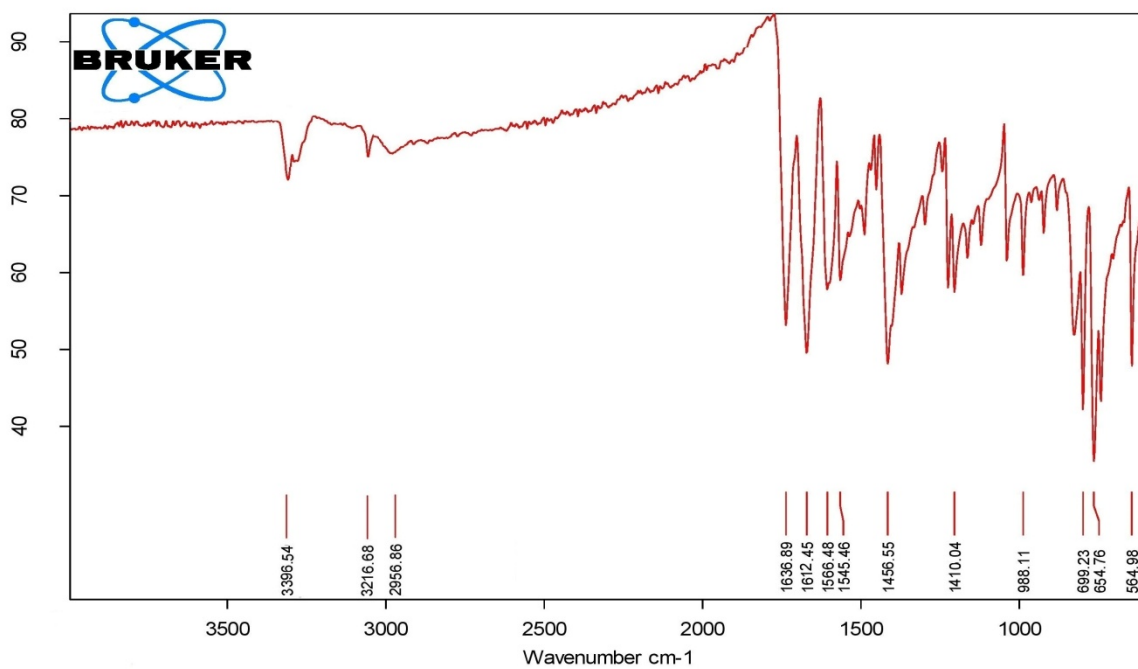

|                      |             |                                    |            |
|----------------------|-------------|------------------------------------|------------|
| F:\DTL\BU3SnClAC2H.0 | BU3SnClAC2H | Instrument type and / or accessory | 10/12/2019 |
|----------------------|-------------|------------------------------------|------------|

**Fig. S12** FTIR spectrum of the tributyltin(IV) chloride complex (**4**) with 3-Acetylamino-3(2-hydroxyphenyl) propanoic acid **L<sub>1</sub>**

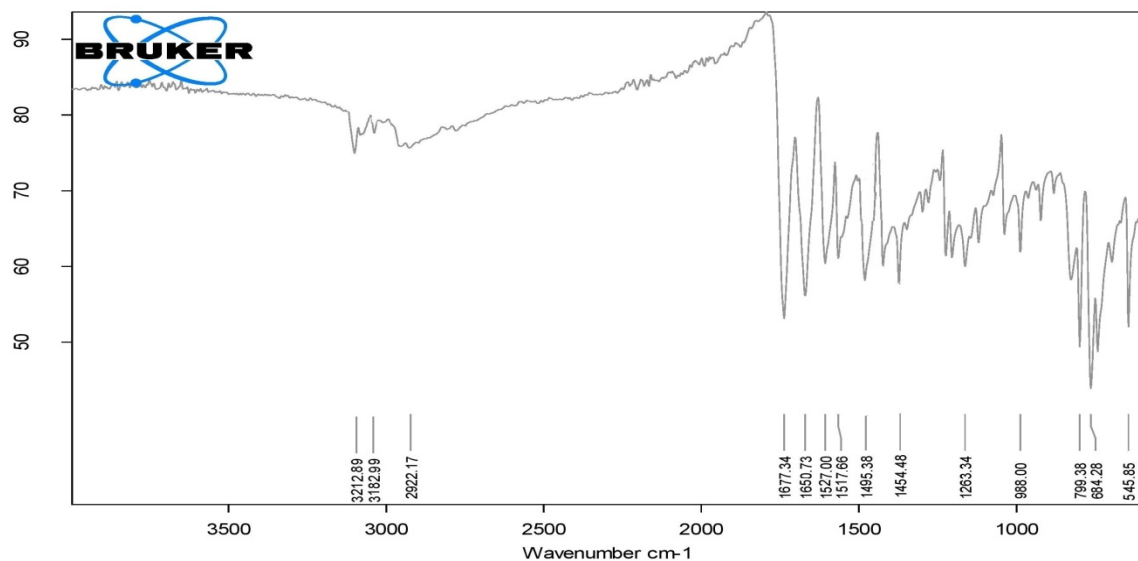

|                      |             |                                    |            |
|----------------------|-------------|------------------------------------|------------|
| F:\DTL\ph3snclac2z.0 | ph3snclac2z | Instrument type and / or accessory | 10/12/2019 |
|----------------------|-------------|------------------------------------|------------|

**Fig. S13** FTIR spectrum of the triphenyltin(IV) chloride complex (**5**) with 3-Acetylamino-3(2-

hydroxyphenyl) propanoic acid **L**<sub>1</sub>

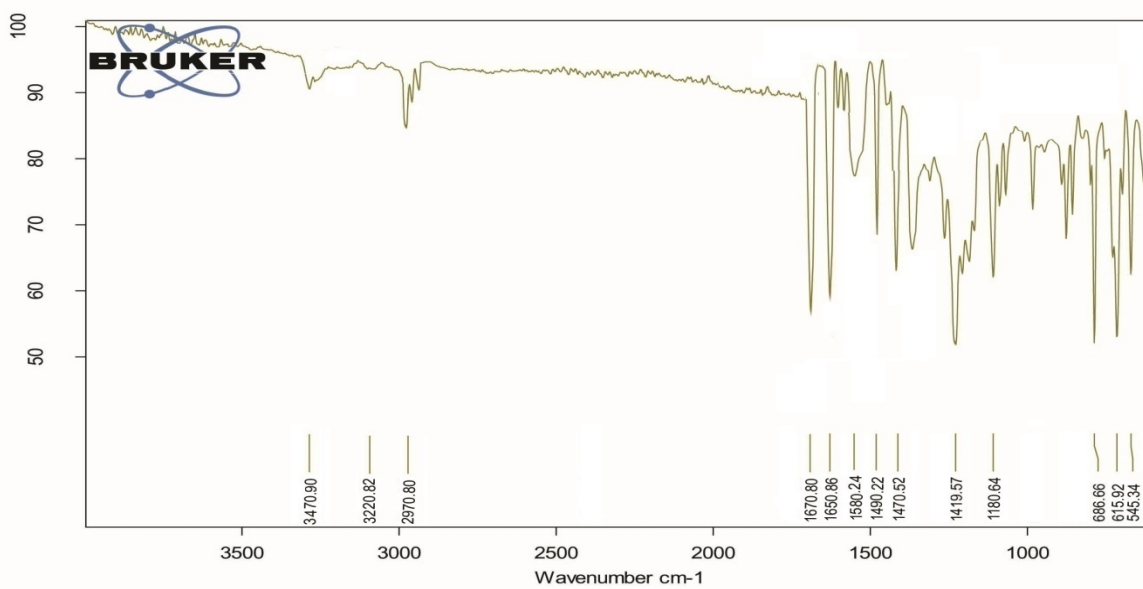

F:\DTL\Cyclohex3snclac2h.0    Cyclohex3snclac2h    Instrument type and / or accessory    8/10/2019

**Fig. S14** FTIR spectrum of the tricyclohexyltin(IV) chloride complex (**6**) with 3-Acetylamino-3(2-hydroxyphenyl) propanoic acid **L**<sub>1</sub>



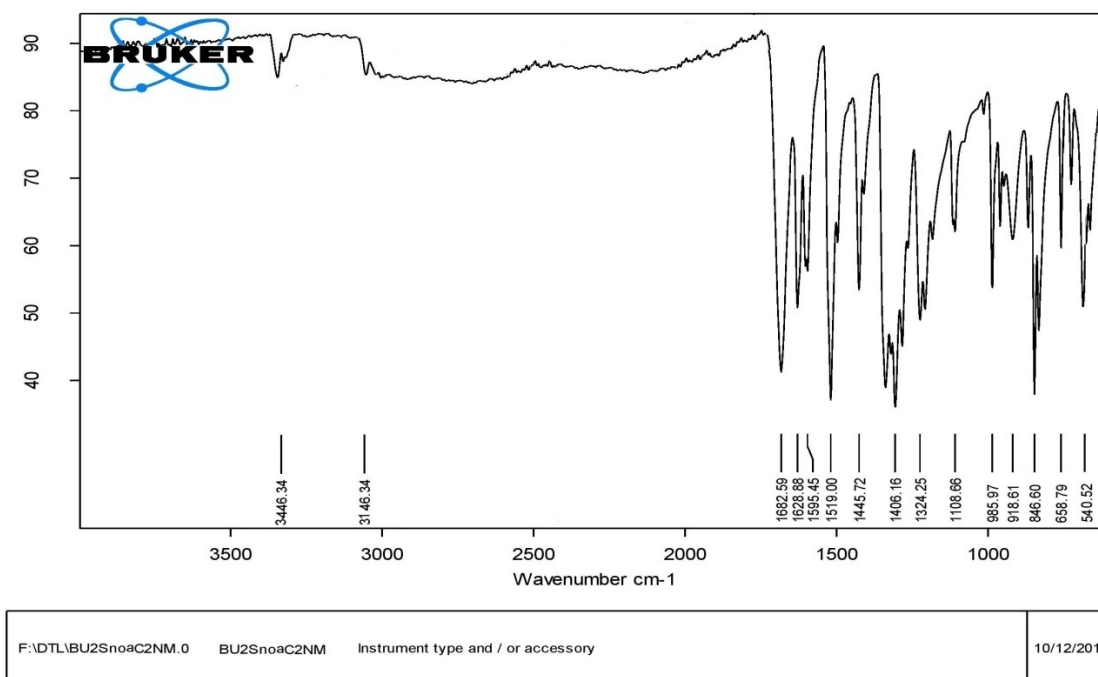

**Fig. S15** FTIR spectrum of the dibutyltin(IV) oxide monomer complex (**7**) with 3-Acetylamino-3(2-nitrophenyl) propanoic acid  $L_4$

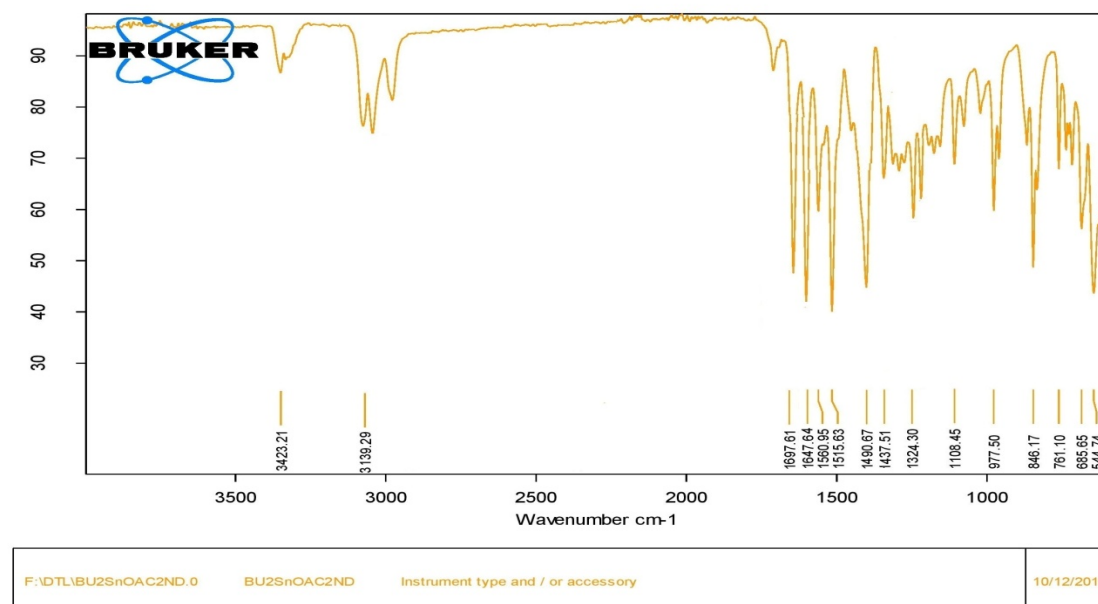

**Fig. S16** FTIR spectrum of the dibutyltin(IV) oxide dimer complex (**8**) with 3-Acetylamino-3(2-nitrophenyl) propanoic acid  $L_4$

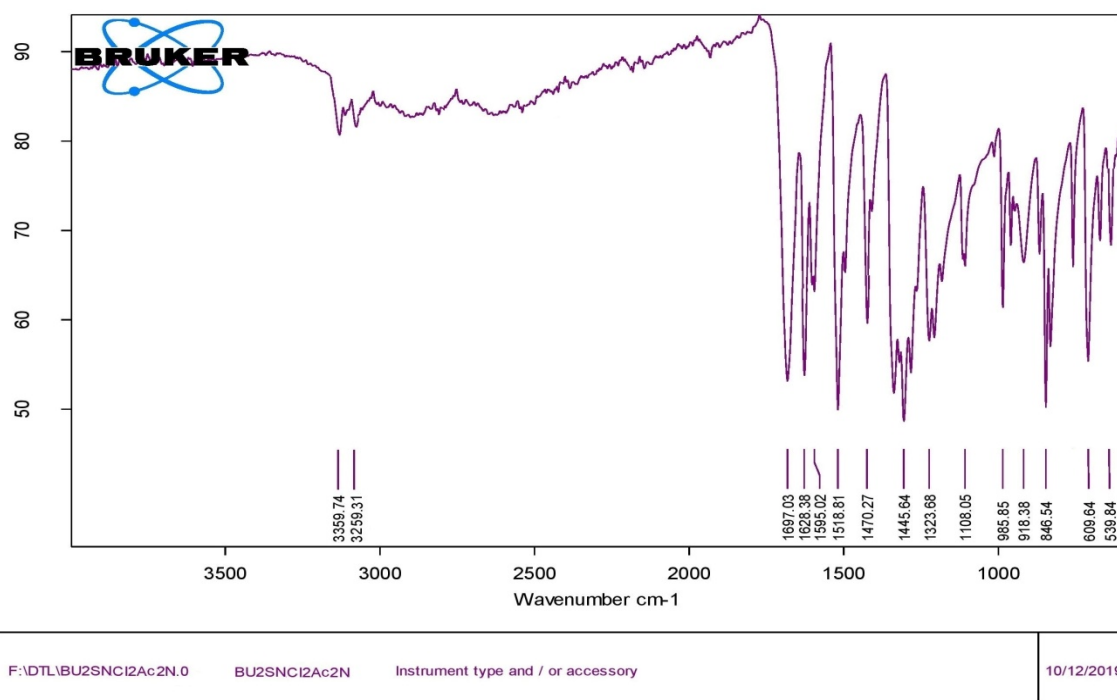

**Fig. S17** FTIR spectrum of the dibutyltin(IV) dichloride complex (**9**) with 3-Acetylamino-3(2-nitrophenyl) propanoic acid **L<sub>4</sub>**

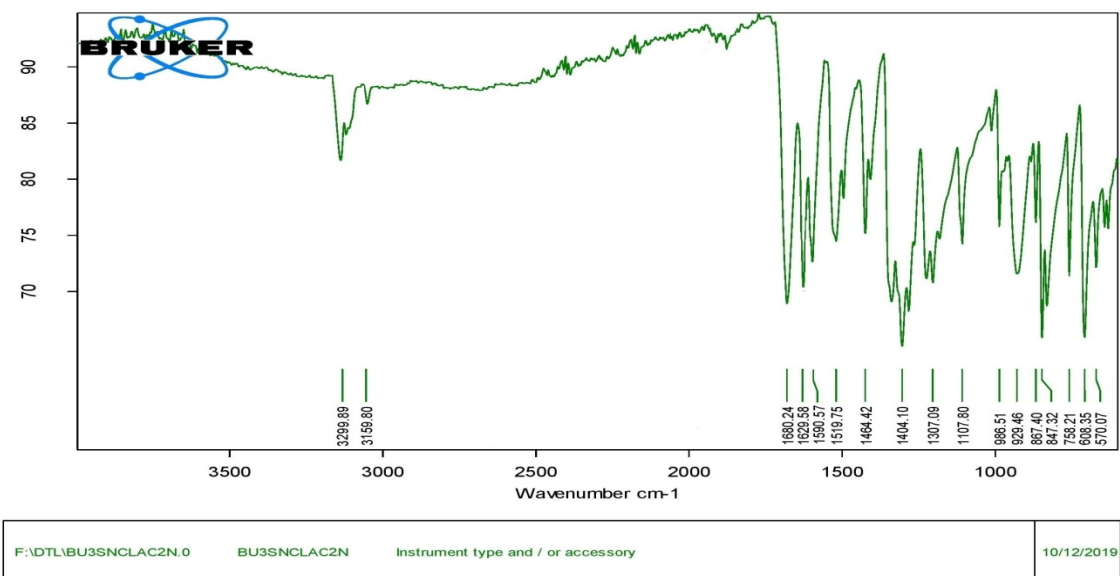

**Fig. S18** FTIR spectrum of the tributyltin(IV) chloride complex (**10**) with 3-Acetylamino-3(2-nitrophenyl) propanoic acid **L<sub>4</sub>**

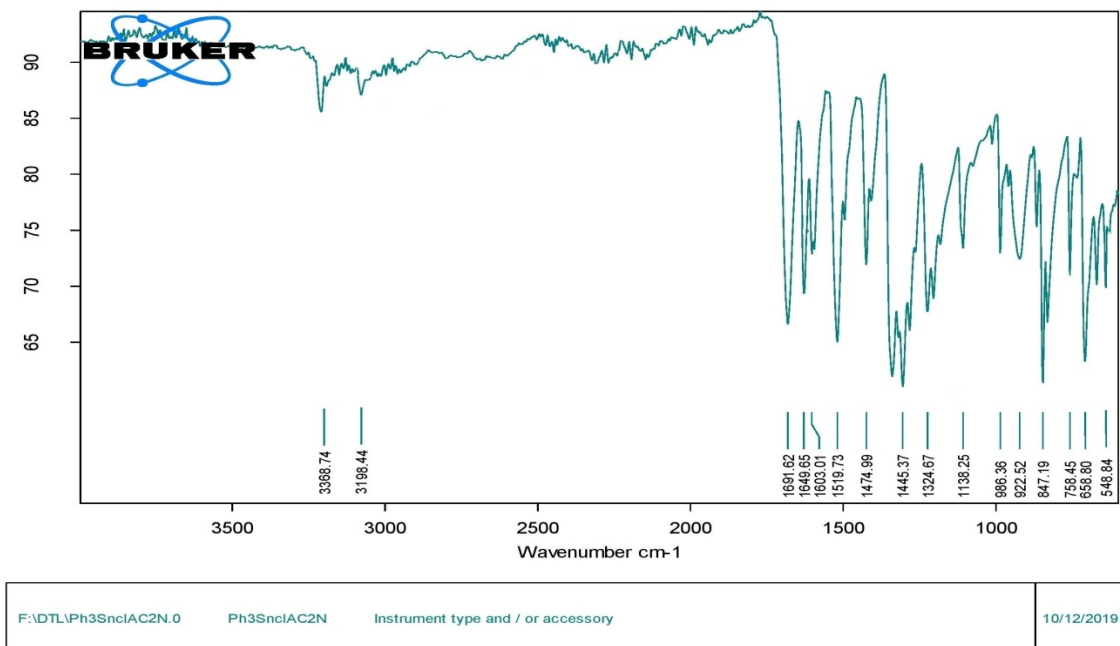

**Fig. S19** FTIR spectrum of the triphenyltin(IV) chloride complex (**11**) with 3-Acetylamino-3(2-nitrophenyl) propanoic acid **L<sub>4</sub>**

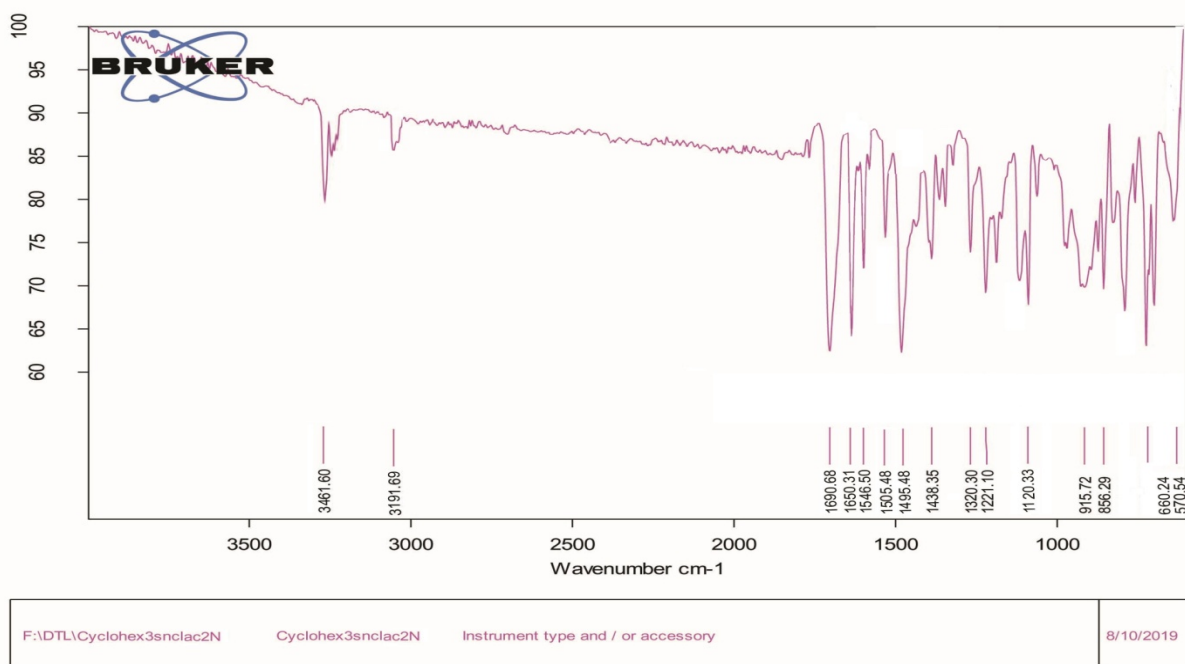

**Fig. S20** FTIR spectrum of the tricyclohexyltin(IV) chloride complex (**12**) with 3-Acetylamino-3(2-nitrophenyl) propanoic acid **L<sub>4</sub>**

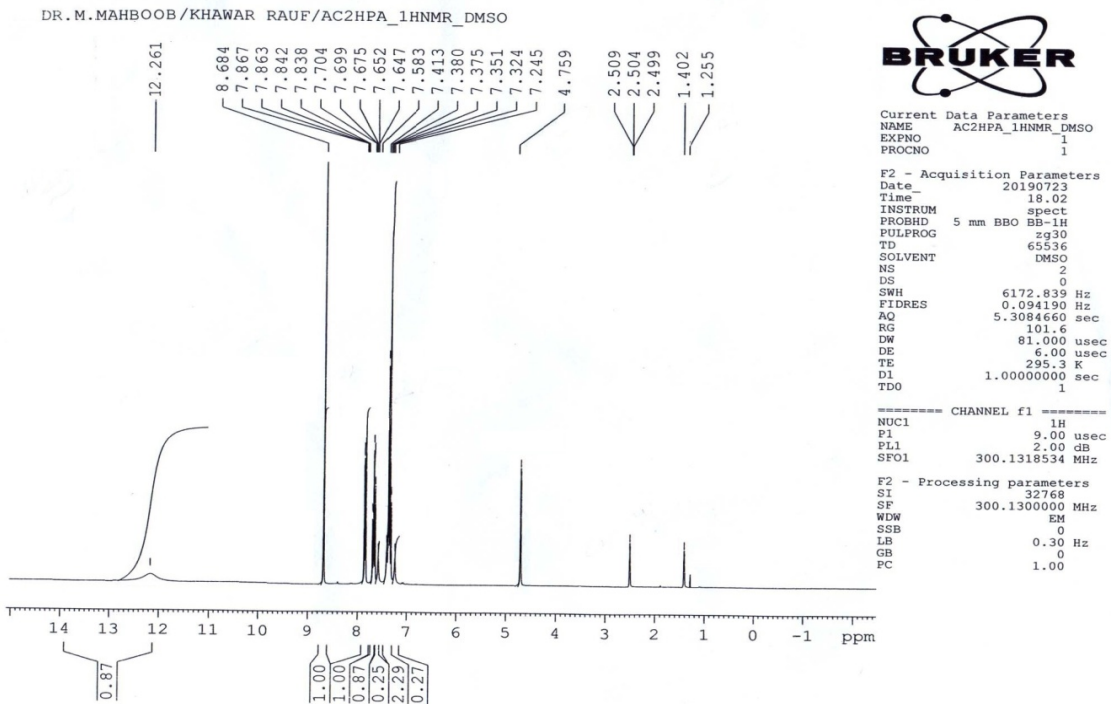

Fig. S21  $^1\text{H}$  NMR spectrum (400 MHz, DMSO) of 3-Acetylamino-3(2-hydroxyphenyl) propanoic acid  $L_1$

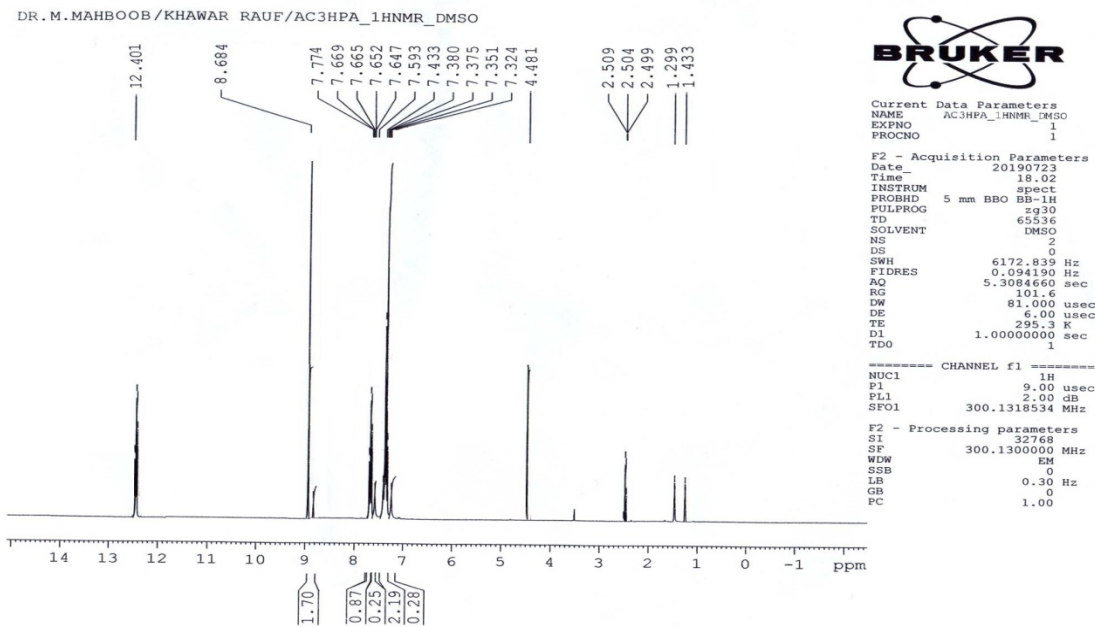

Fig. S22  $^1\text{H}$  NMR spectrum (400 MHz, DMSO) of 3-Acetylamino-3(3-hydroxyphenyl) propanoic acid  $L_2$

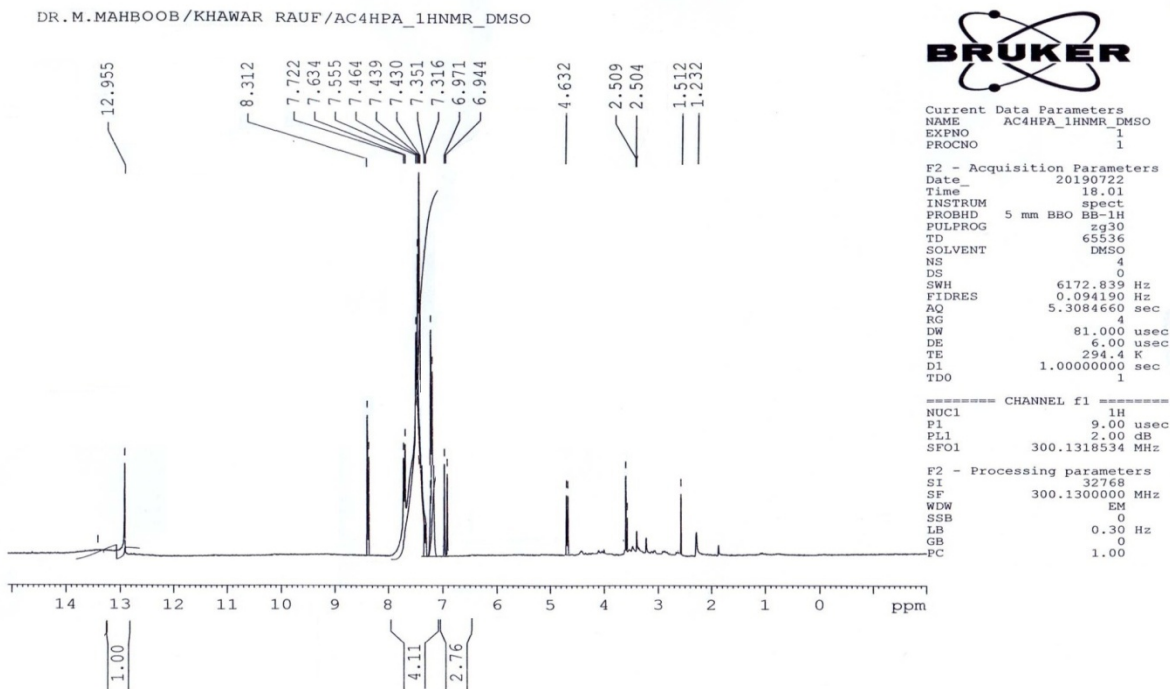

Fig. S23  $^1\text{H}$  NMR spectrum (400 MHz, DMSO) of 3-Acetylamino-3(4-hydroxyphenyl) propanoic acid **L<sub>3</sub>**

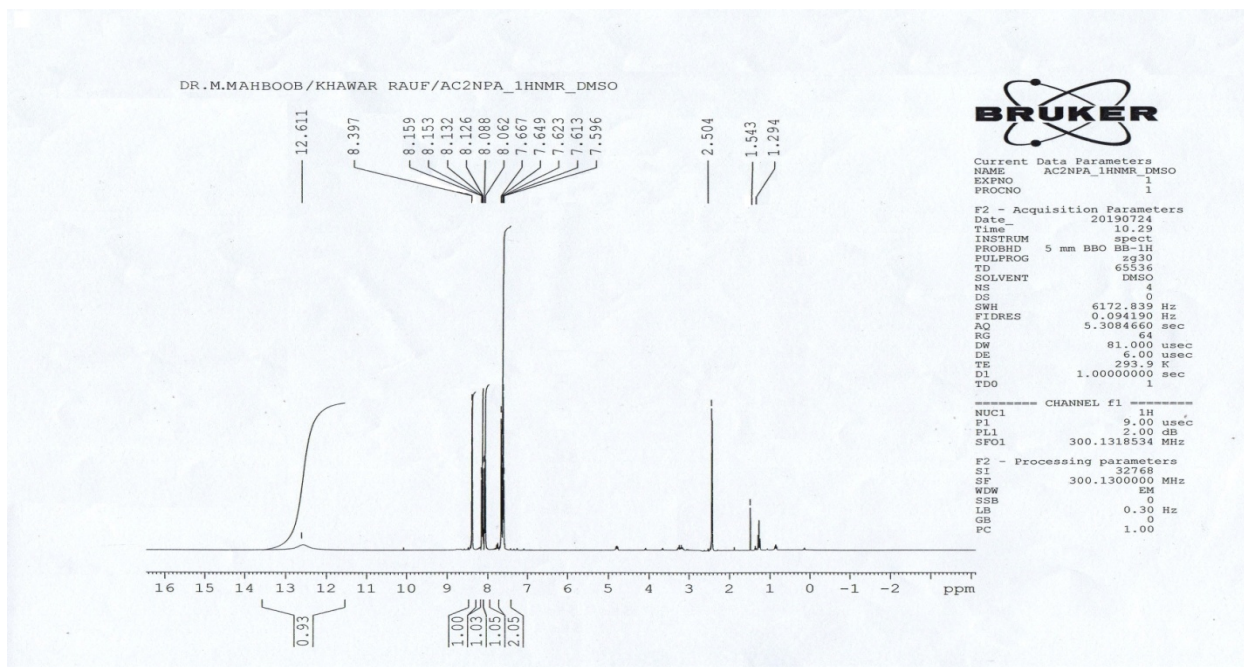

Fig. S24  $^1\text{H}$  NMR spectrum (400 MHz, DMSO) of 3-Acetylamino-3(2-nitrophenyl) propanoic acid

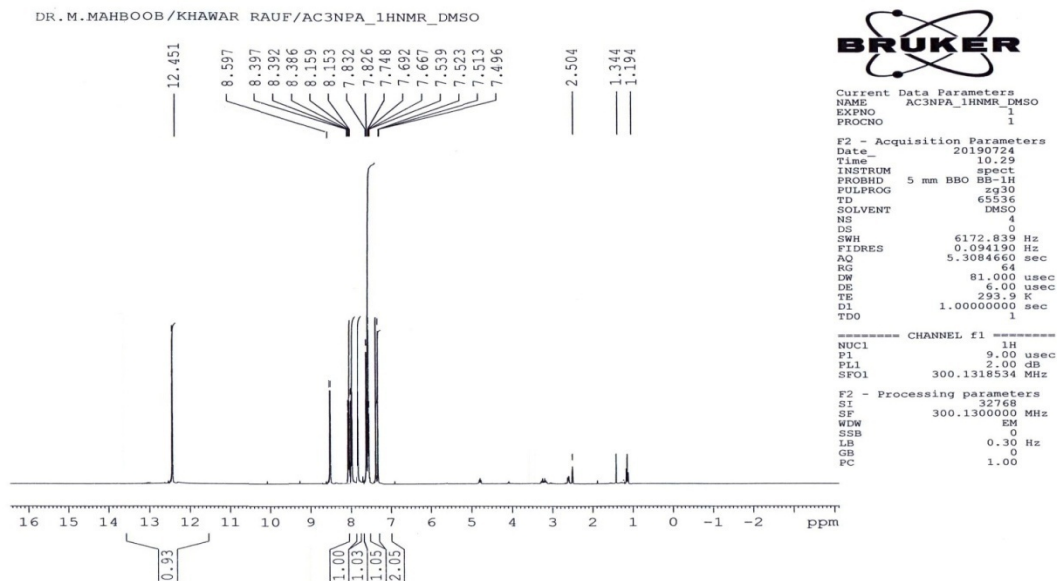

Fig. S25 <sup>1</sup>H NMR spectrum (400 MHz, DMSO) of 3-Acetylamino-3(3-nitrophenyl) propanoic acid

L<sub>5</sub>

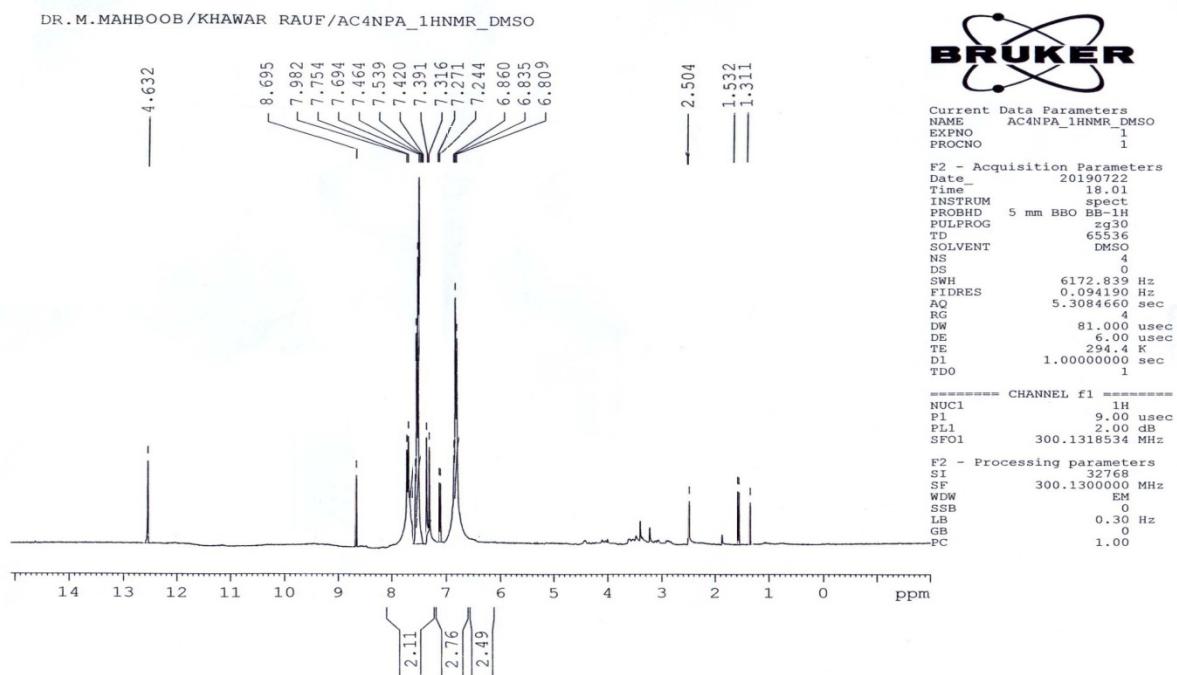

Fig. S26 <sup>1</sup>H NMR spectrum (400 MHz, DMSO) of 3-Acetylamino-3(4-nitrophenyl) propanoic acid

L<sub>6</sub>

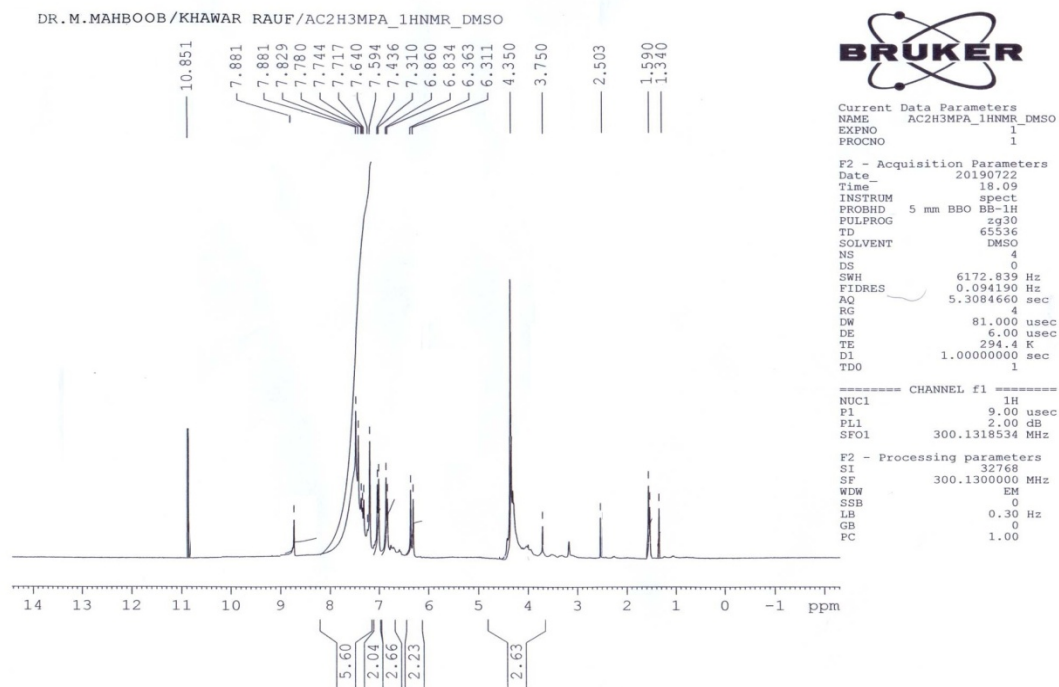

**Fig. S27**  $^1\text{H}$  NMR spectrum (400 MHz, DMSO) of 3-Acetylamino-3(2-hydroxy-3-methoxyphenyl) propanoic acid **L<sub>7</sub>**

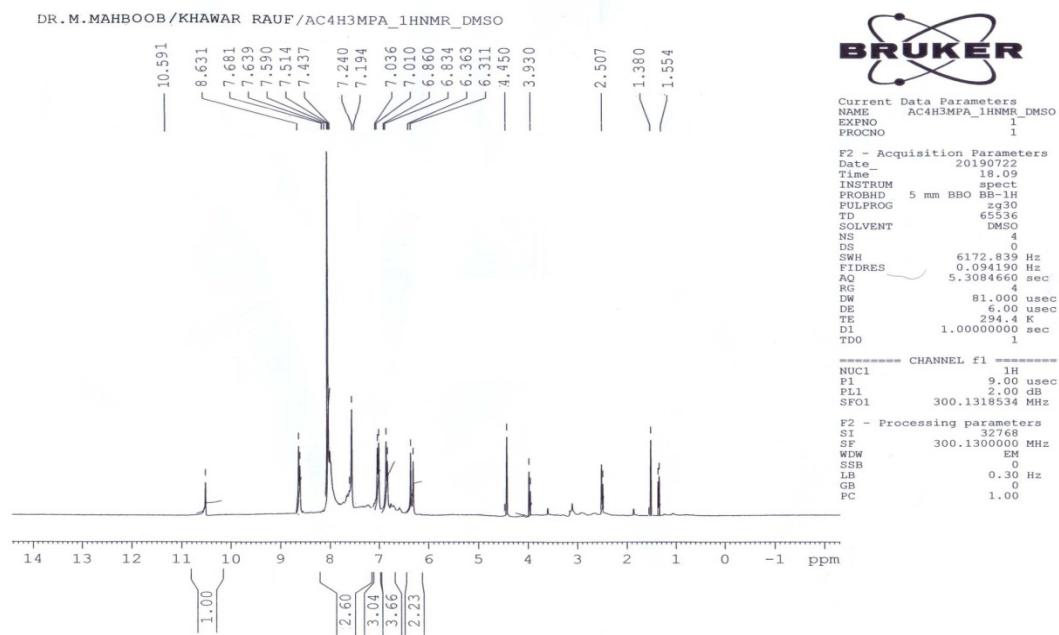

**Fig. S28**  $^1\text{H}$  NMR spectrum of 3-Acetylamino-3(4-hydroxy-3-methoxyphenyl) propanoic acid **L<sub>8</sub>**

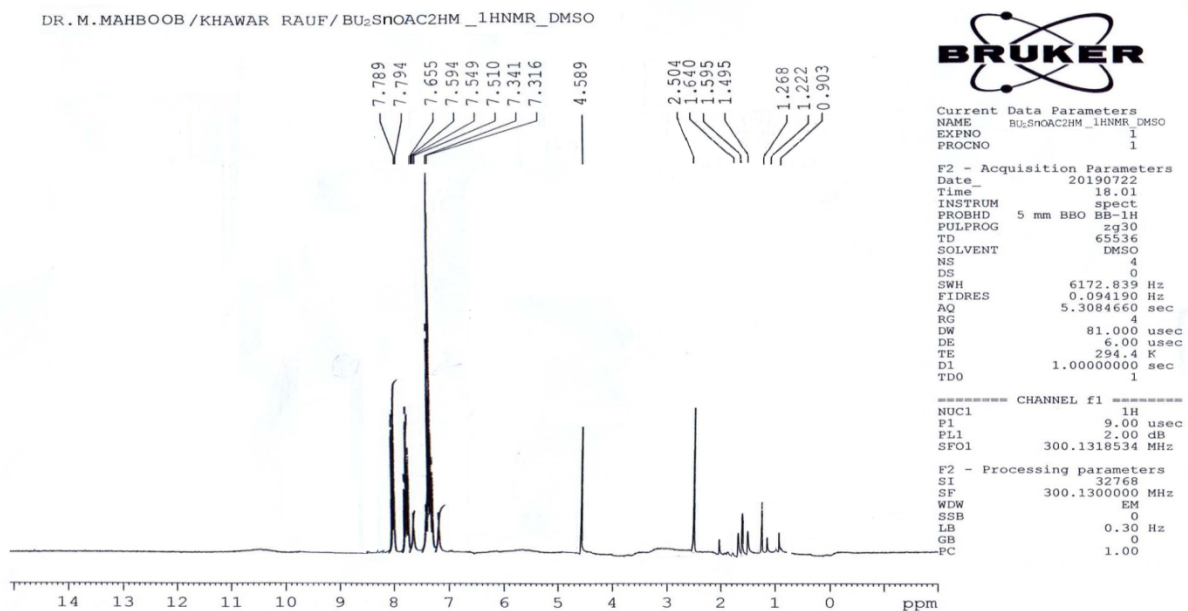

**Fig. S29** <sup>1</sup>H NMR spectrum (400 MHz, DMSO) of the dibutyltin(IV) oxide monomer complex (1) with 3-Acetylamino-3(2-hydroxyphenyl) propanoic acid L<sub>1</sub>

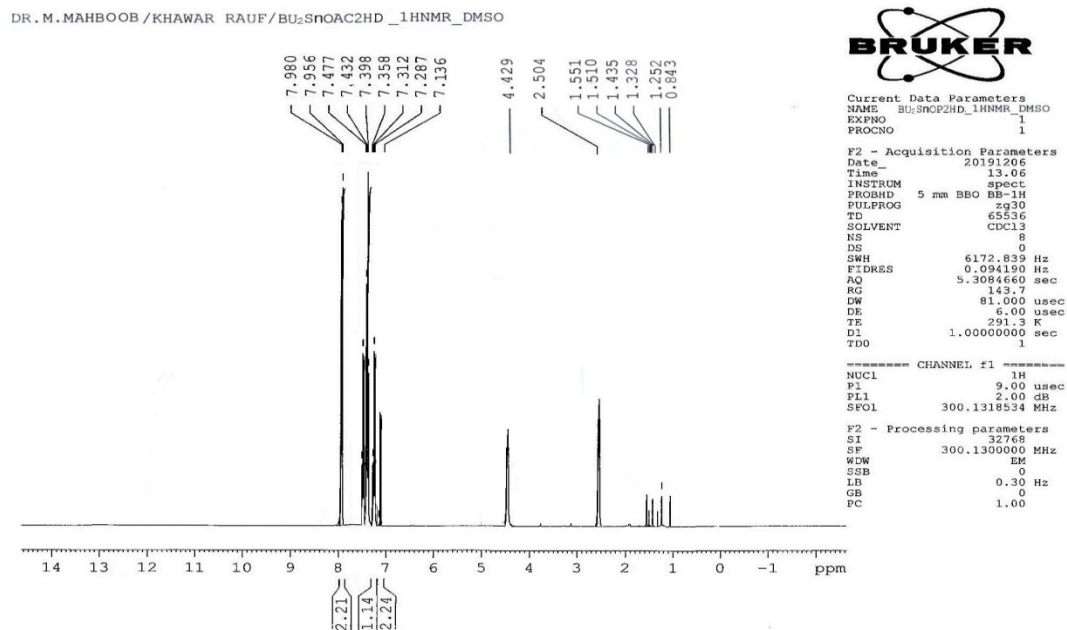

**Fig. S30** <sup>1</sup>H NMR spectrum (400 MHz, DMSO) of the dibutyltin(IV) oxide dimer complex (2) with 3-Acetylamino-3(2-hydroxyphenyl) propanoic acid L<sub>1</sub>



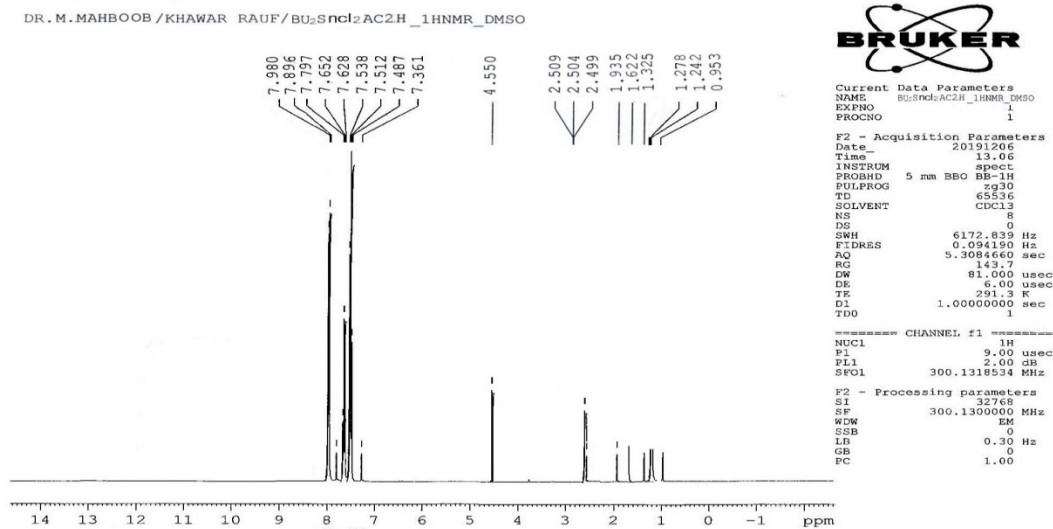

**Fig. S31** <sup>1</sup>H NMR spectrum (400 MHz, DMSO) of the dibutyltin(IV) dichloride complex (**3**) with Acetylamino-3(2-hydroxyphenyl) propanoic acid **L**<sub>1</sub>

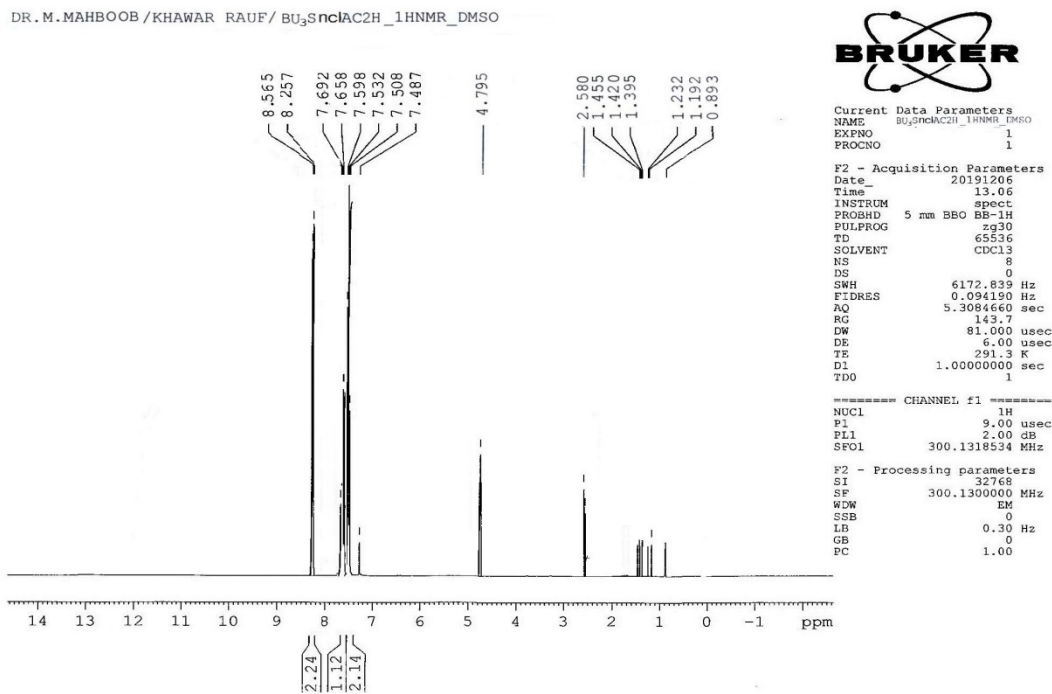

**Fig. S32** <sup>1</sup>H NMR spectrum (400 MHz, DMSO) of the tributyltin(IV) chloride complex (**4**) with Acetylamino-3(2-hydroxyphenyl) propanoic acid **L**<sub>1</sub>

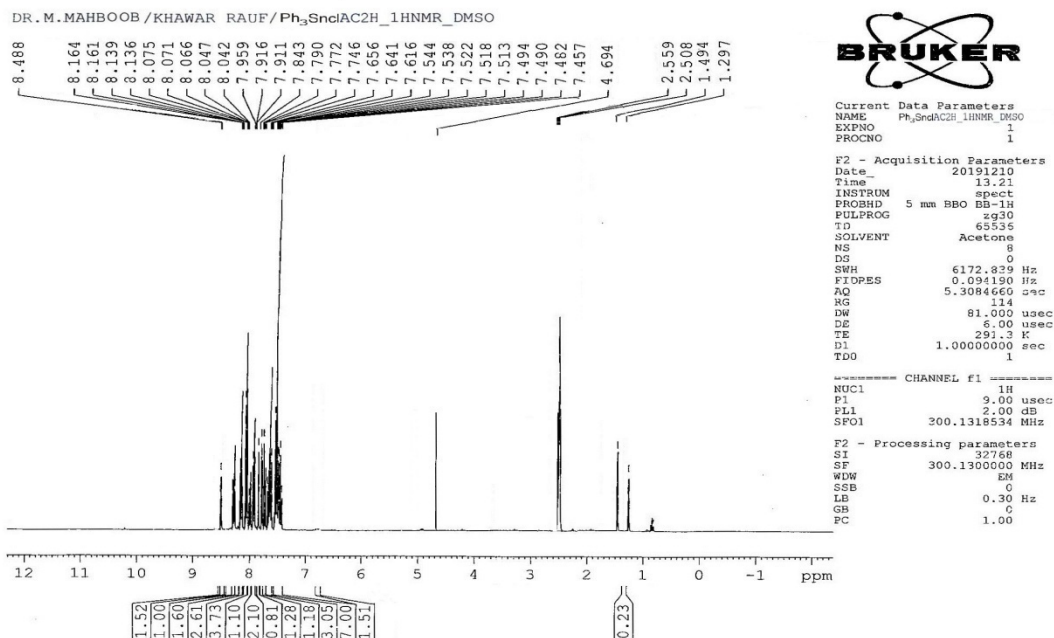

**Fig. S33** <sup>1</sup>H NMR spectrum (400 MHz, DMSO) of the triphenyltin(IV) chloride complex (5) with 3-Acetylamino-3(2-hydroxyphenyl) propanoic acid L<sub>1</sub>

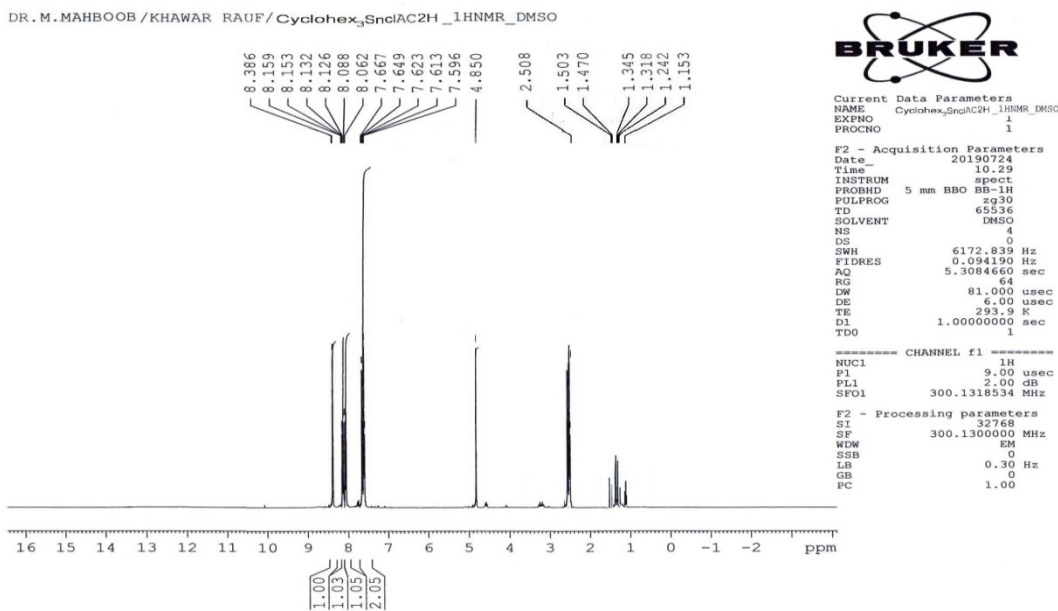

**Fig. S34** <sup>1</sup>H NMR spectrum (400 MHz, DMSO) of the tricyclohexyltin(IV) chloride complex (6) with 3-Acetylamino-3(2-hydroxyphenyl) propanoic acid L<sub>1</sub>

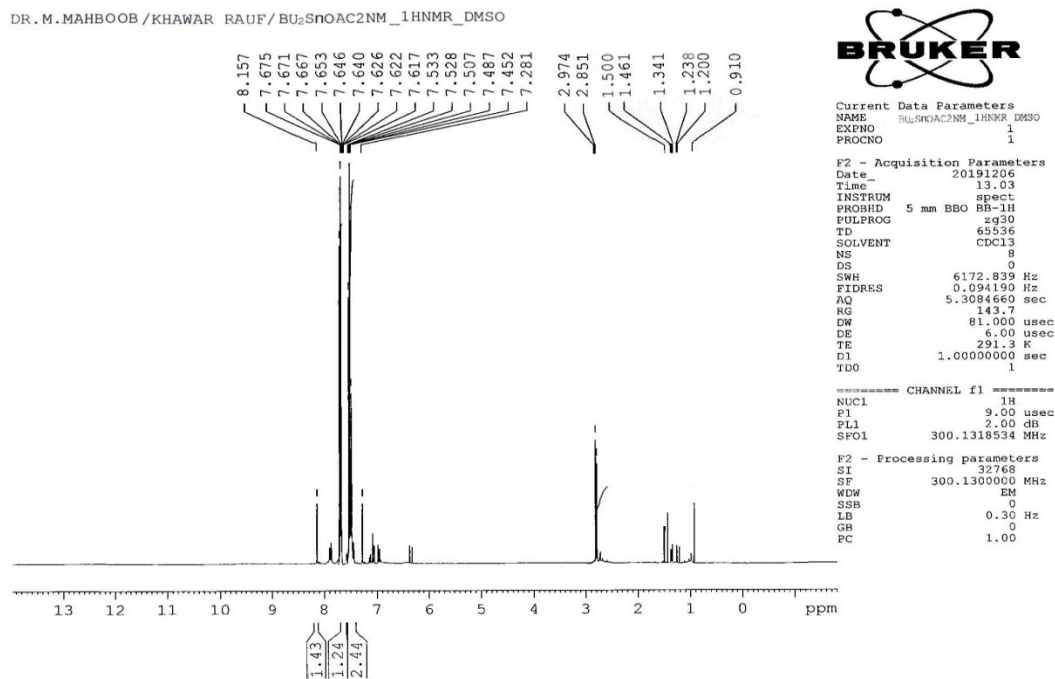

**Fig. S35** <sup>1</sup>H NMR spectrum (400 MHz, DMSO) of the dibutyltin(IV) oxide monomer complex (7) with 3-Acetylamino-3(2-nitrophenyl) propanoic acid L<sub>4</sub>

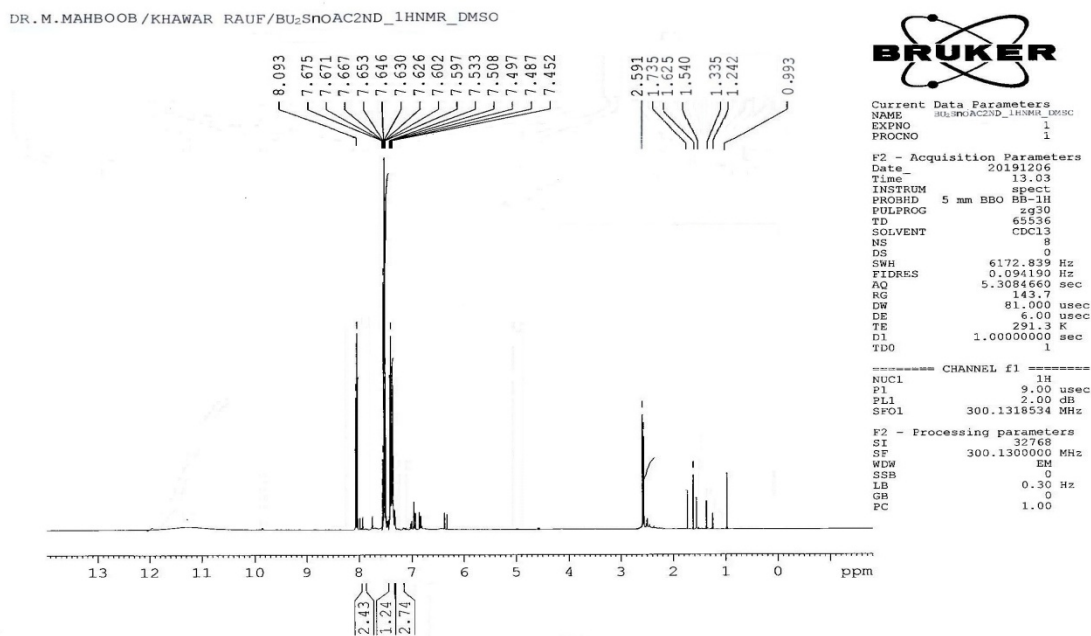

**Fig. S36** <sup>1</sup>H NMR spectrum (400 MHz, DMSO) of the dibutyltin(IV) oxide dimer complex (8) with 3-Acetylamino-3(2-nitrophenyl) propanoic acid L<sub>4</sub>

DR. M. MAHBOOB / KHAWAR RAUF / BU<sub>2</sub>SnCl<sub>2</sub>AC2N\_1HNMR\_DMSO

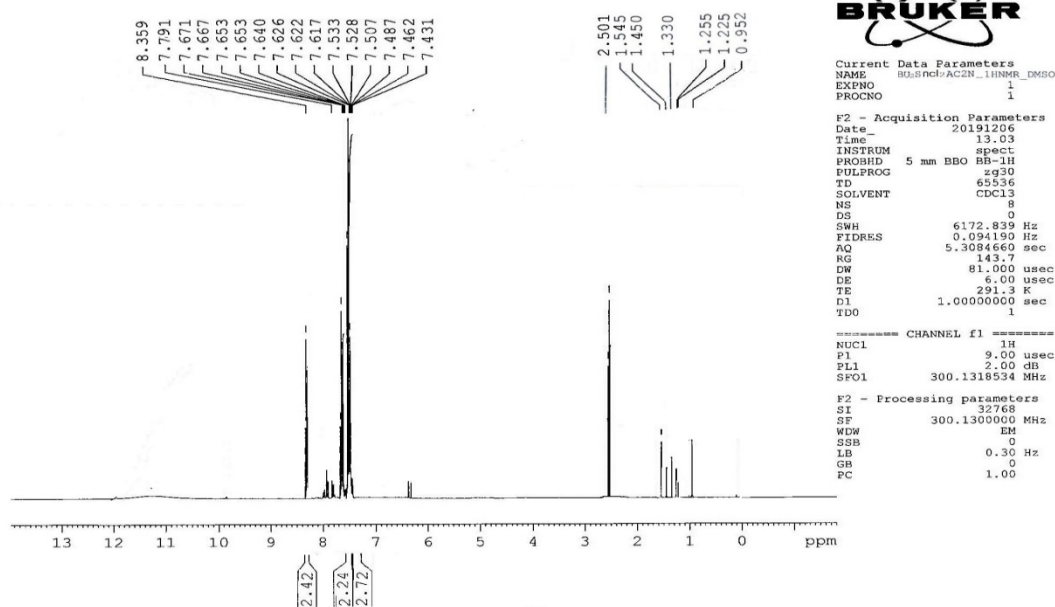

Fig. S37 <sup>1</sup>H NMR spectrum (400 MHz, DMSO) of the dibutyltin(IV) dichloride complex (9) with 3-Acetylamino-3(2-nitrophenyl) propanoic acid L<sub>4</sub>

DR. M. MAHBOOB / KHAWAR RAUF / BU<sub>3</sub>SnClAC2N\_1HNMR\_DMSO

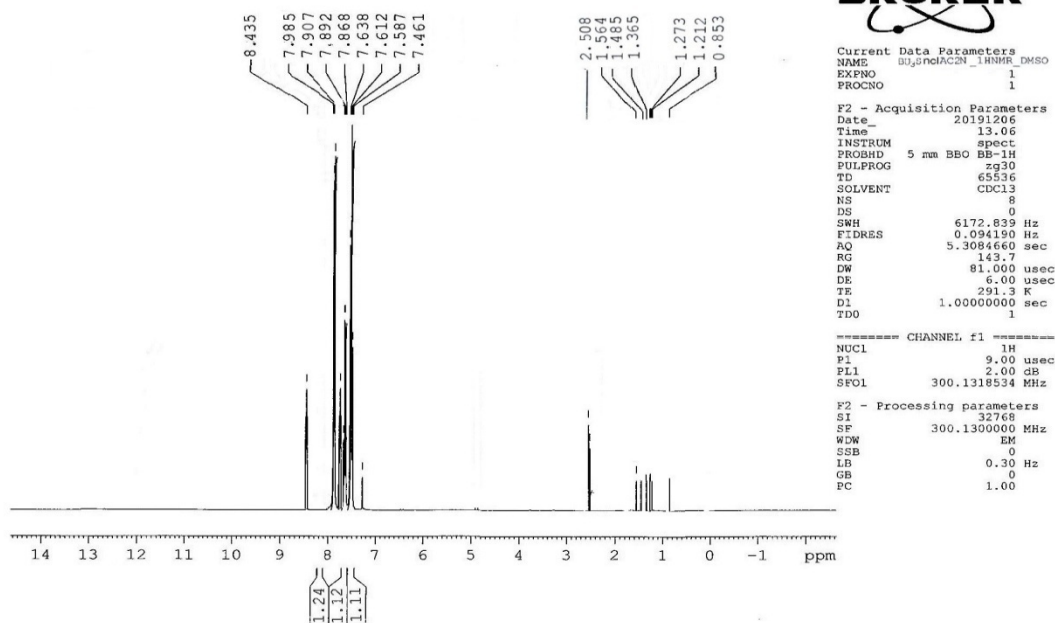

Fig. S38 <sup>1</sup>H NMR spectrum (400 MHz, DMSO) of the tributyltin(IV) chloride complex (10) with 3-Acetylamino-3(2-nitrophenyl) propanoic acid L<sub>4</sub>

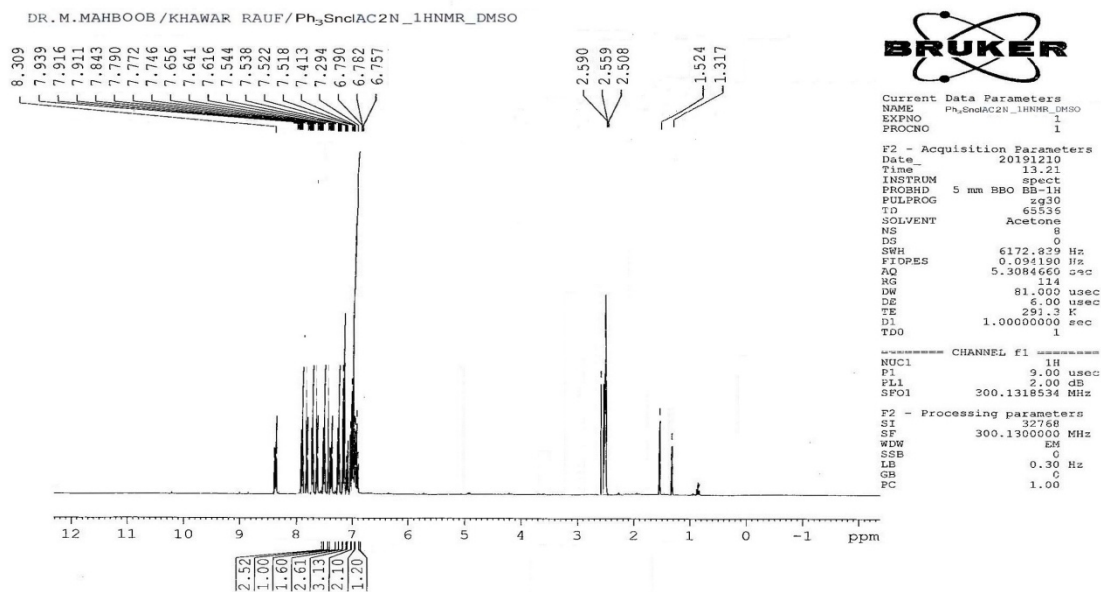

Fig. S39 <sup>1</sup>H NMR spectrum (400 MHz, DMSO) of the triphenyltin(IV) chloride complex (11) with 3-Acetylamino-3(2-nitrophenyl) propanoic acid L<sub>4</sub>

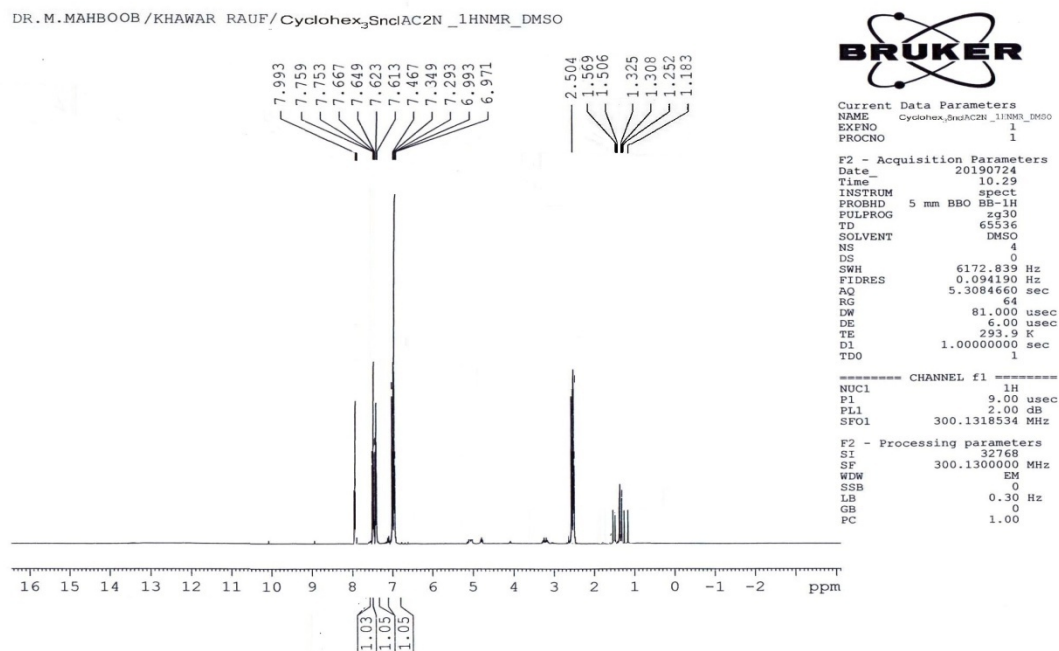

Fig. S40 <sup>1</sup>H NMR spectrum (400 MHz, DMSO) of the tricyclohexyltin(IV) chloride complex (12) with 3-Acetylamino-3(2-nitrophenyl) propanoic acid L<sub>4</sub>

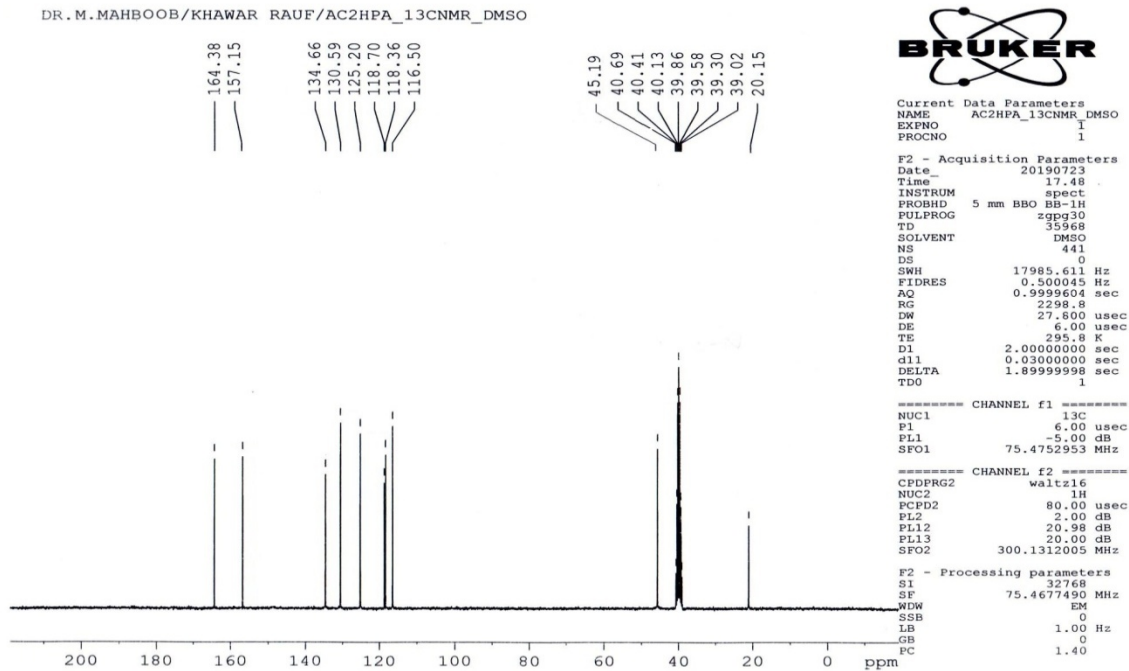

Fig. S41 <sup>13</sup>C NMR spectrum (100 MHz, DMSO) of 3-Acetylamino-3(2-hydroxyphenyl) propanoic acid L<sub>1</sub>

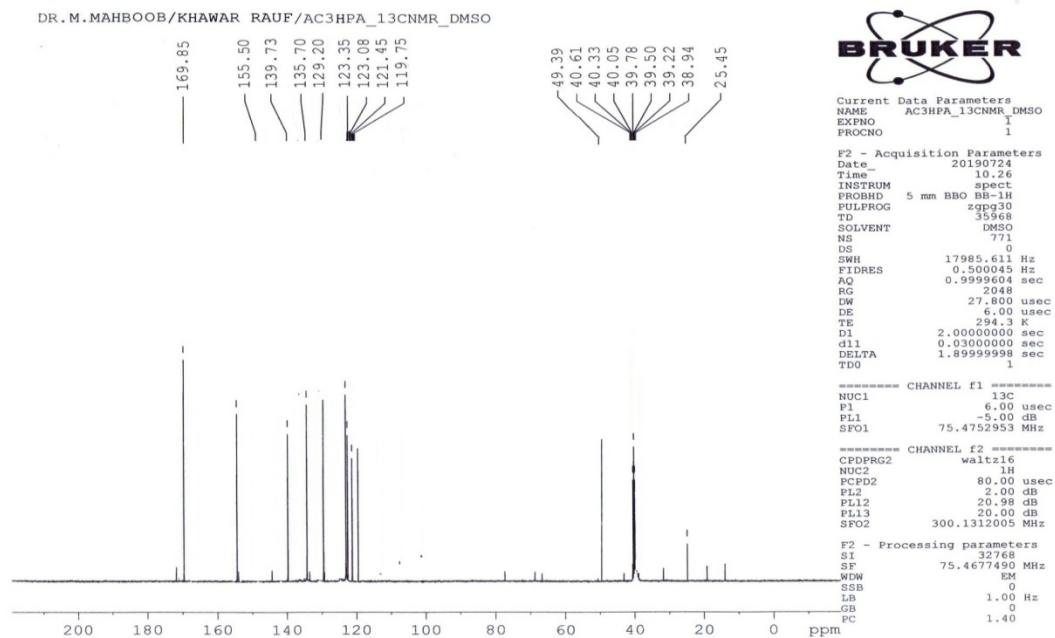

Fig. S42 <sup>13</sup>C NMR spectrum (100 MHz, DMSO) of 3-Acetylamino-3(3-hydroxyphenyl) propanoic acid L<sub>2</sub>

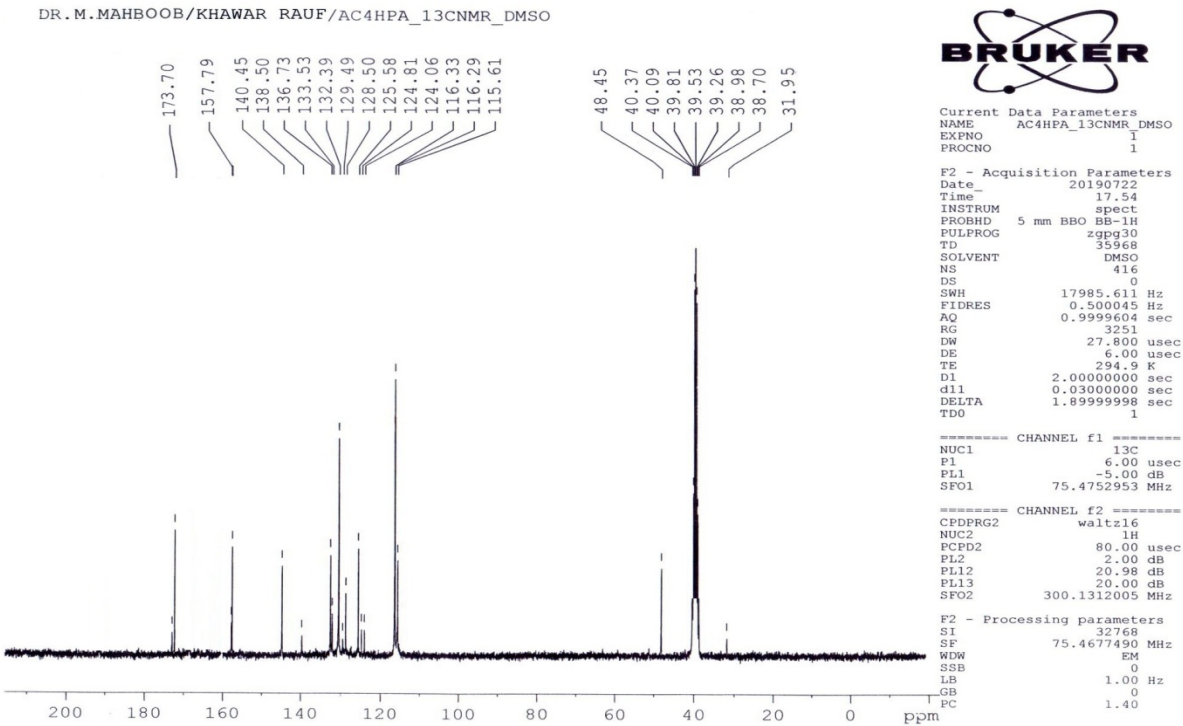

Fig. S43 <sup>13</sup>C NMR spectrum (100 MHz, DMSO) of 3-Acetylamino-3(4-hydroxyphenyl) propanoic acid L<sub>3</sub>

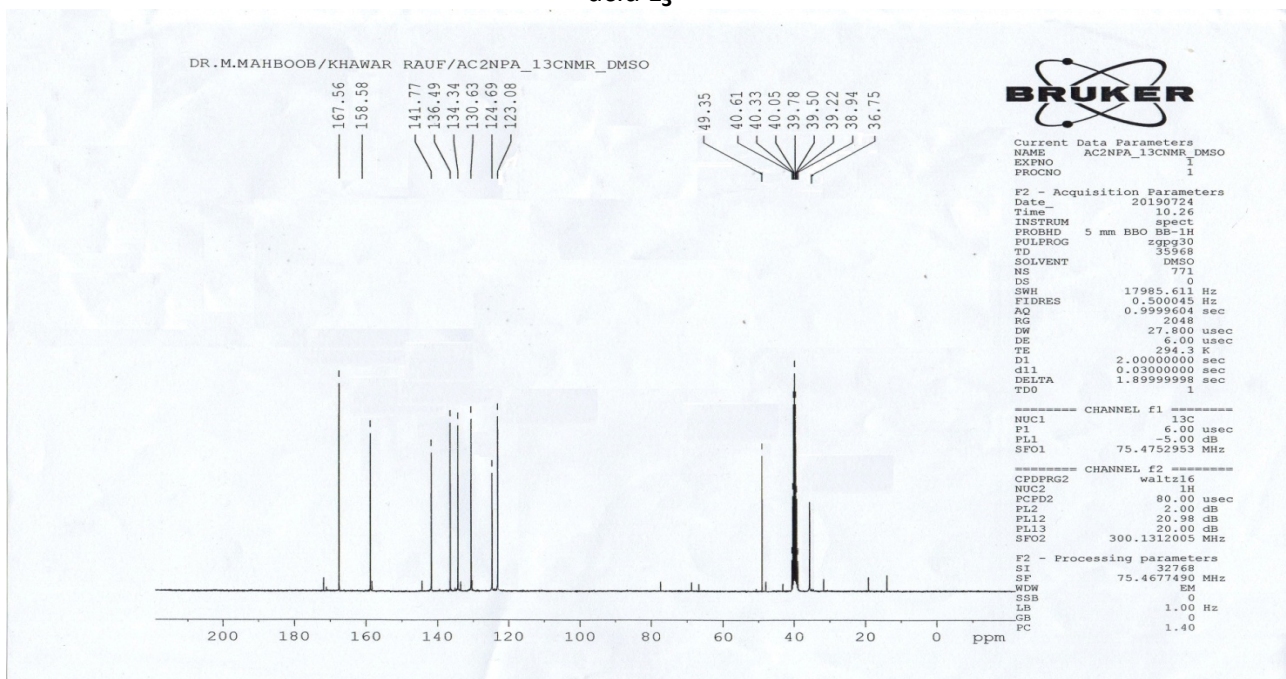

Fig. S44 <sup>13</sup>C NMR spectrum (100 MHz, DMSO) of 3-Acetylamino-3(2-nitrophenyl) propanoic acid L<sub>4</sub>

DR. AMIN BADSHAH/KHAWAR RAUF/AC3NPA\_1HNMR\_DMSO

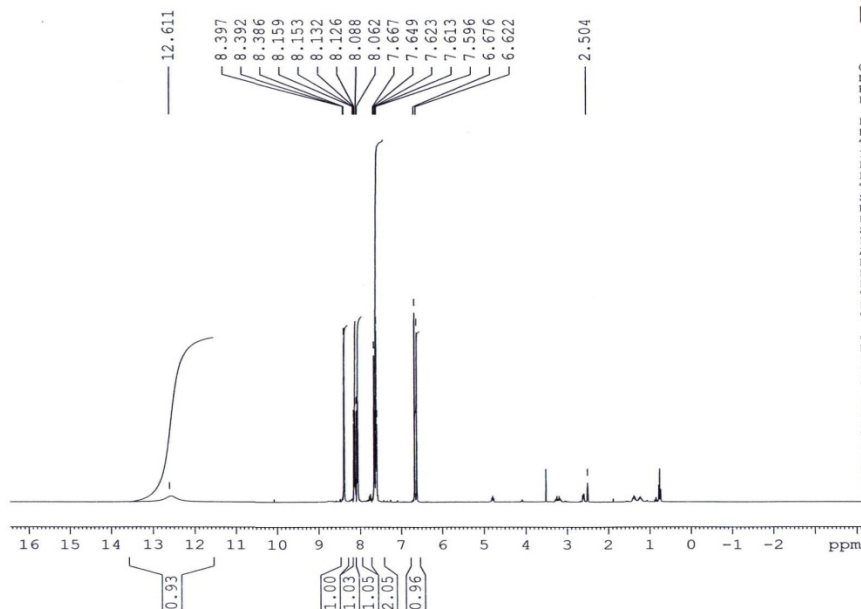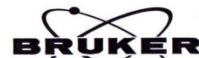

Current Data Parameters  
NAME AC3NPA\_1HNMR\_DMSO  
EXPNO 1  
PROCNO 1

F2 - Acquisition Parameters  
Date\_ 20190724  
Time\_ 10.29  
INSTRUM spect  
PROBHD 5 mm BBO BB-1H  
PULPROG zg30  
TD 65536  
SOLVENT DMSO  
NS 4  
DS 0  
SWH 6172.839 Hz  
FIDRES 0.094190 Hz  
AQ 5.3084660 sec  
RG 64  
DW 81.000 usec  
DE 6.00 usec  
TE 293.9 K  
D1 1.0000000 sec  
TDO 1

----- CHANNEL f1 -----  
NUC1 1H  
P1 9.00 usec  
PL1 2.00 dB  
SFO1 300.1318534 MHz

F2 - Processing parameters  
SI 32768  
SF 300.1300000 MHz  
WDW EM  
SSB 0  
LB 0.30 Hz  
GB 0  
PC 1.00

Fig. S45 <sup>13</sup>C NMR spectrum (100 MHz, DMSO) of 3-Acetylamino-3(3-nitrophenyl) propanoic acid

L<sub>5</sub>

DR. M. MAHBOOB/KHAWAR RAUF/AC4NPA\_13CNMR\_DMSO

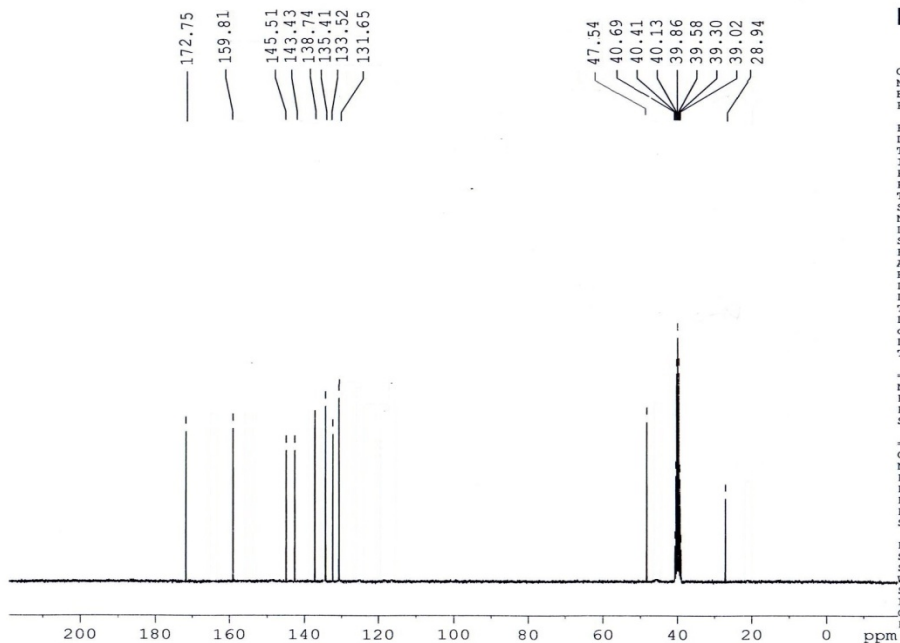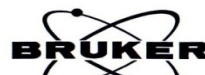

Current Data Parameters  
NAME AC4NPA\_13CNMR\_DMSO  
EXPNO 1  
PROCNO 1

F2 - Acquisition Parameters  
Date\_ 20190723  
Time\_ 17.48  
INSTRUM spect  
PROBHD 5 mm BBO BB-1H  
PULPROG zgpg30  
TD 35968  
SOLVENT DMSO  
NS 441  
DS 0  
SWH 17985.611 Hz  
FIDRES 0.500045 Hz  
AQ 0.9999604 sec  
RG 2298.8  
DW 27.800 usec  
DE 6.00 usec  
TE 295.8 K  
D1 2.0000000 sec  
d11 0.0300000 sec  
DELTA 1.89999998 sec  
TDO 1

----- CHANNEL f1 -----  
NUC1 13C  
P1 6.00 usec  
PL1 -5.00 dB  
SFO1 75.4752953 MHz

----- CHANNEL f2 -----  
CPDPRG2 waltz16  
NUC2 1H  
PCPD2 80.00 usec  
PL2 2.00 dB  
PL12 20.98 dB  
PL13 20.00 dB  
SFO2 300.1312005 MHz

F2 - Processing parameters  
SI 32768  
SF 75.4677490 MHz  
WDW EM  
SSB 0  
LB 1.00 Hz  
GB 0  
PC 1.40

Fig. S46 <sup>13</sup>C NMR spectrum (100 MHz, DMSO) of 3-Acetylamino-3(4-hydroxyphenyl) propanoic acid L<sub>6</sub>

L<sub>6</sub>



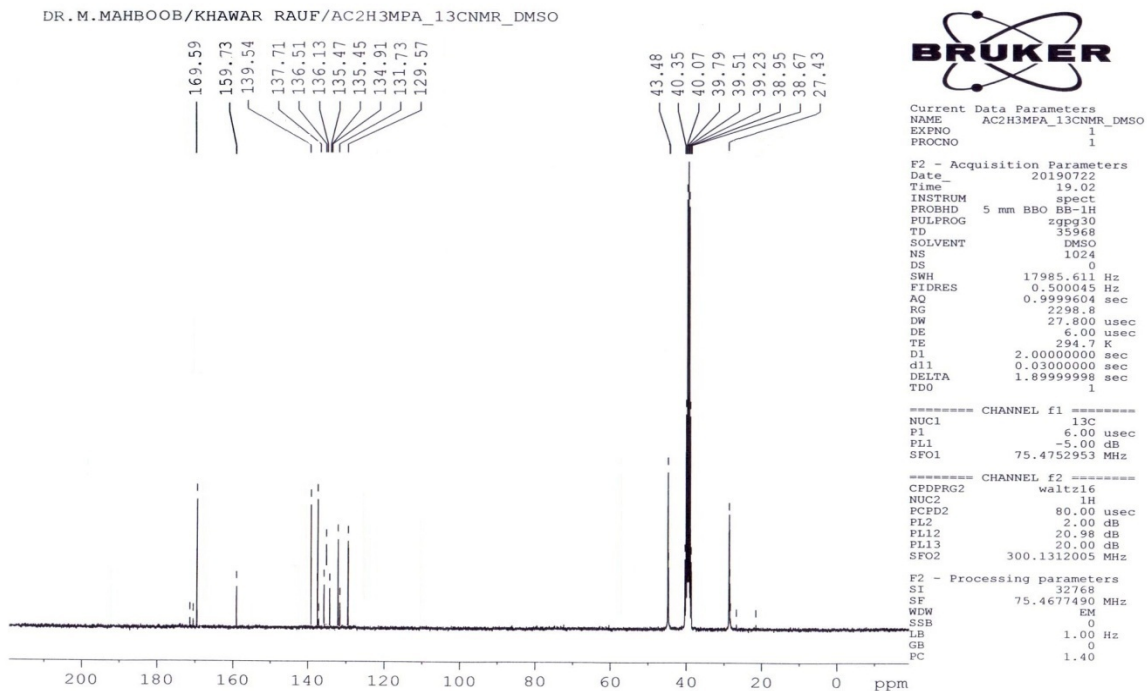

Fig. S47  $^{13}\text{C}$  NMR spectrum (100 MHz, DMSO) of 3-Acetylamino-3(2-hydroxy-3-methoxyphenyl) propanoic acid  $\text{L}_7$

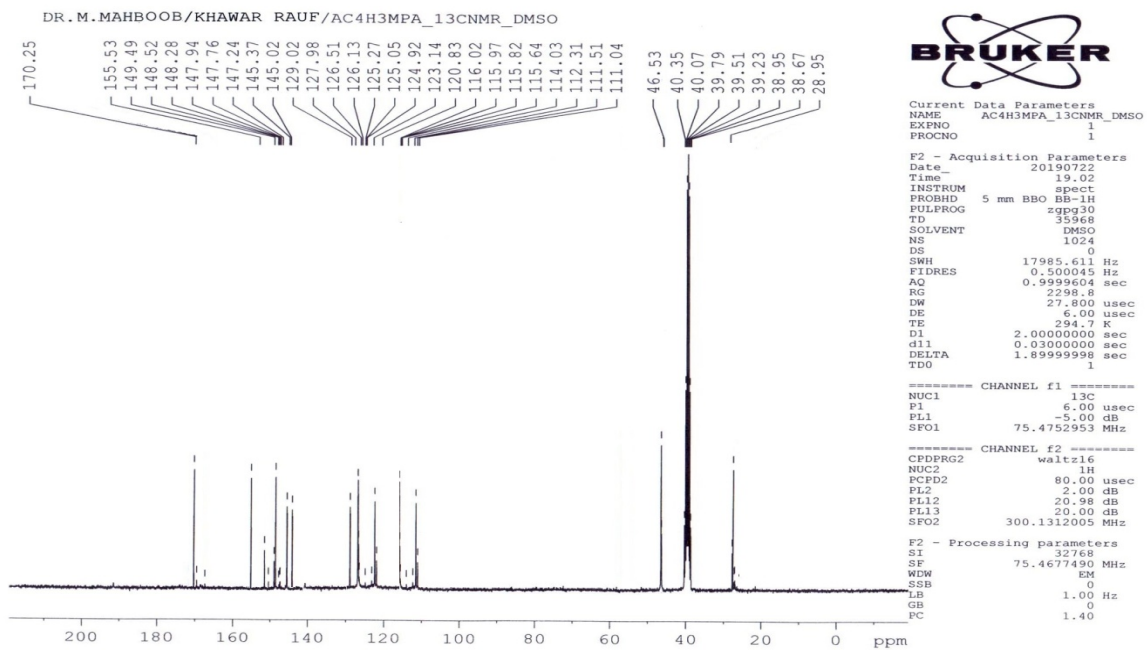

Fig. S48  $^{13}\text{C}$  NMR spectrum (100 MHz, DMSO) of 3-Acetylamino-3(4-hydroxy-3-methoxyphenyl) propanoic acid  $\text{L}_8$

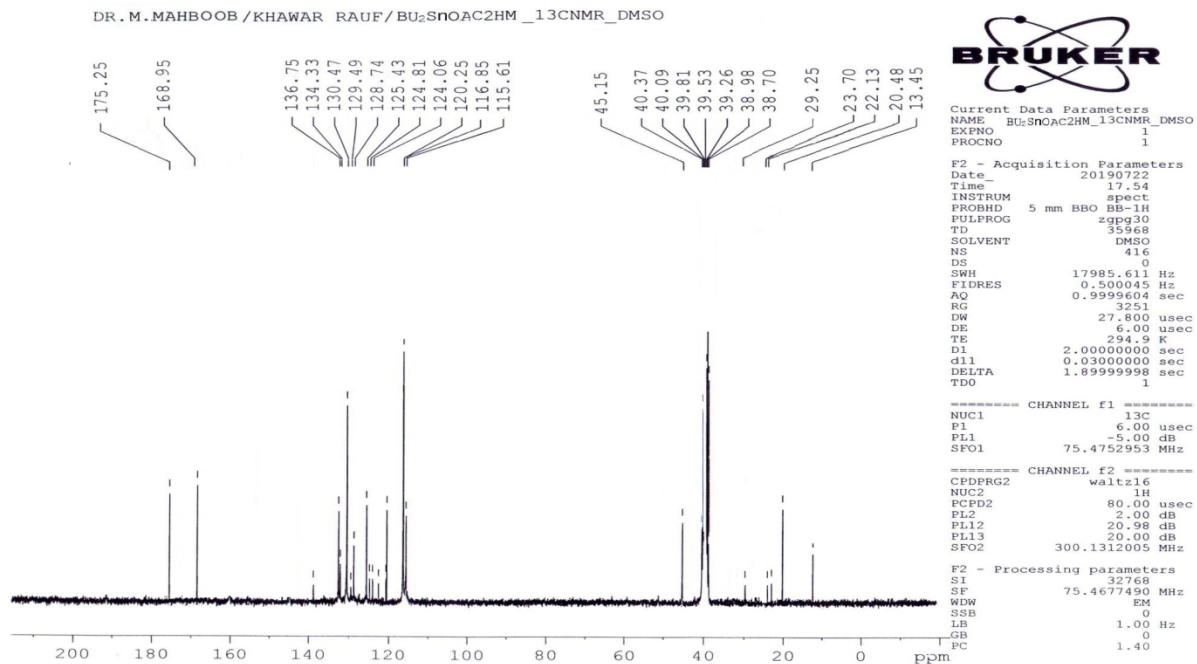

**Fig. S49** <sup>13</sup>C NMR spectrum (100 MHz, DMSO) of the dibutyltin(IV) oxide monomer complex (1) with 3-Acetylamino-3(2-hydroxyphenyl) propanoic acid L<sub>1</sub>

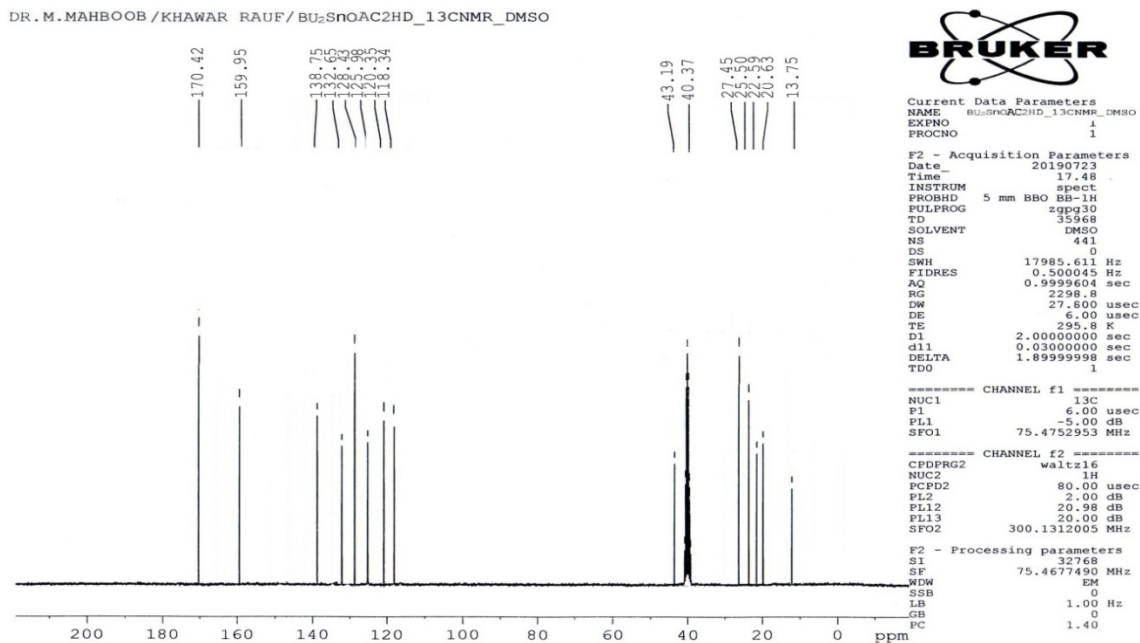

**Fig. S50** <sup>13</sup>C NMR spectrum (100 MHz, DMSO) of the dibutyltin(IV) oxide dimer complex (2) with 3-Acetylamino-3(2-hydroxyphenyl) propanoic acid L<sub>1</sub>

DR. M. MAHBOOB / KHAWAR RAUF / BU<sub>2</sub>SnCl<sub>2</sub>AC2H\_13CNMR\_DMSO

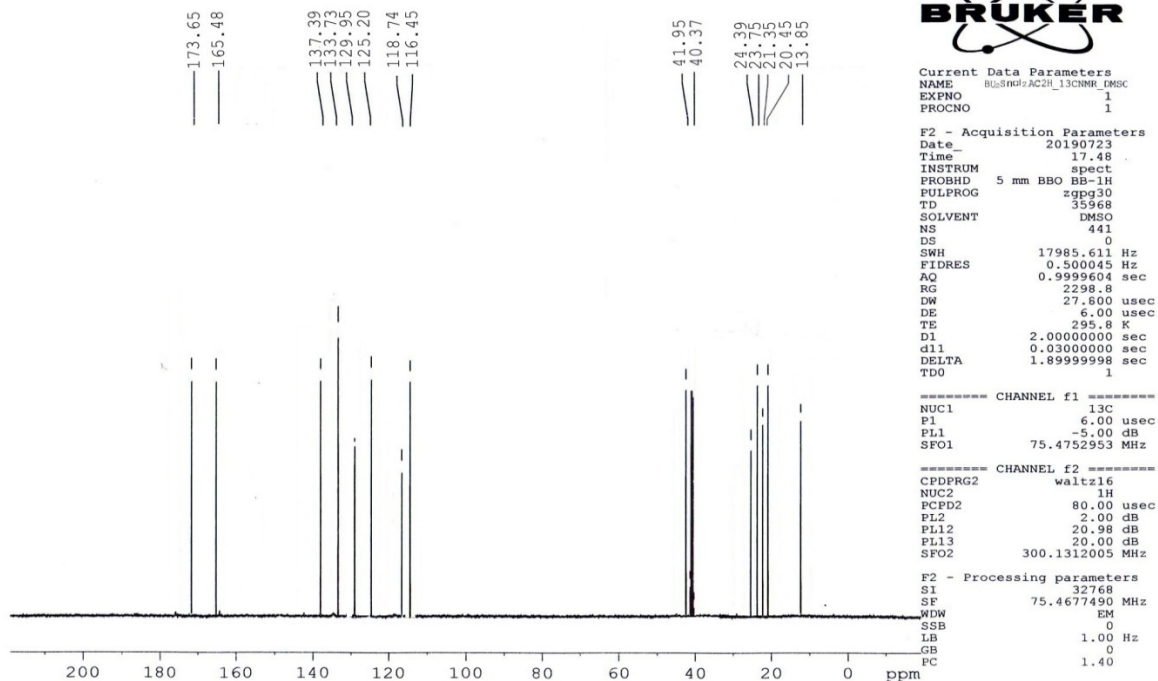

Fig. S51 <sup>13</sup>C NMR spectrum (100 MHz, DMSO) of the dibutyltin(IV) dichloride complex (3) with 3-Acetylamino-3(2-hydroxyphenyl) propanoic acid L<sub>1</sub>

DR. M. MAHBOOB / KHAWAR RAUF / BU<sub>3</sub>SnClAC2H\_13CNMR\_DMSO

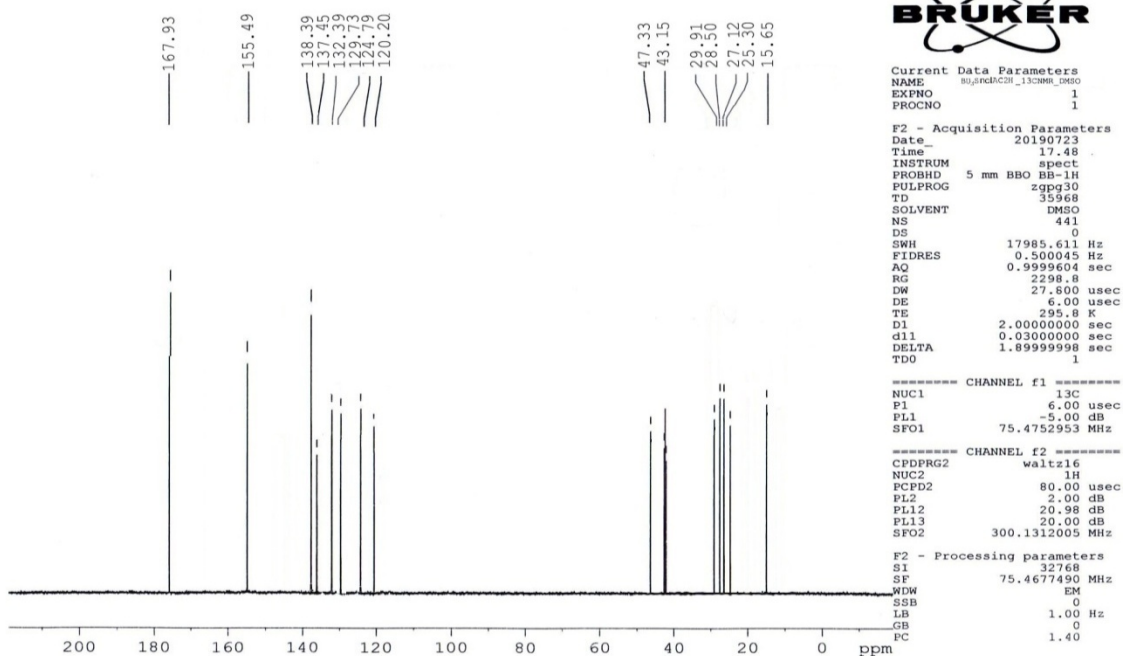

Fig. S52 <sup>13</sup>C NMR spectrum (100 MHz, DMSO) of the tributyltin(IV) chloride complex (4) with 3-Acetylamino-3(2-hydroxyphenyl) propanoic acid L<sub>1</sub>

DR. M. MAHBOOB / KHAWAR RA'JF / Ph<sub>3</sub>SnClAC2H\_13CNMR\_DMSO

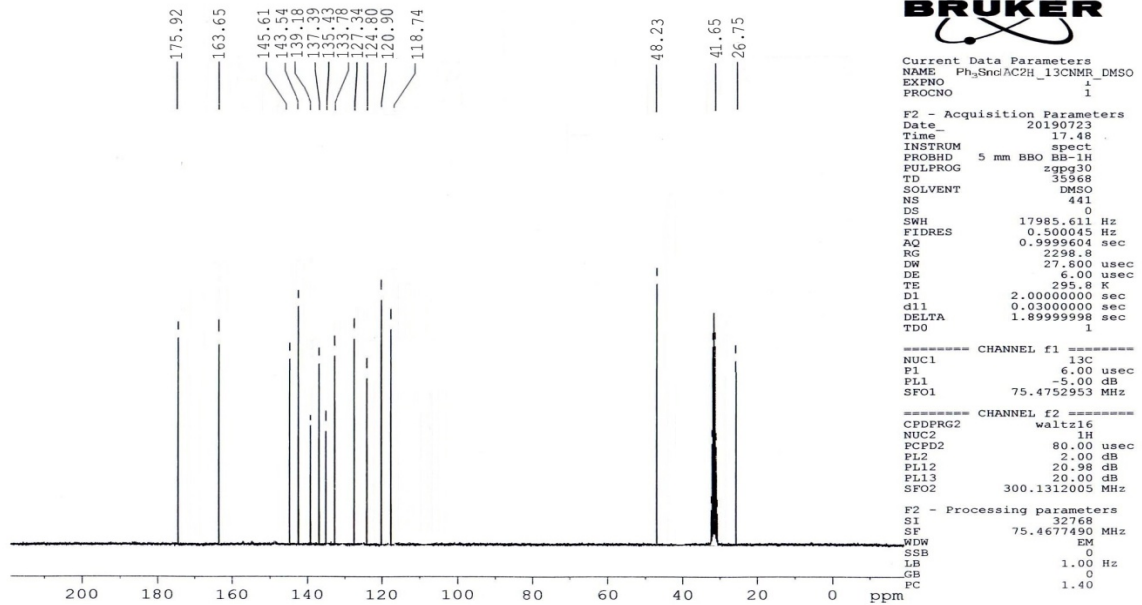

Fig. S53 <sup>13</sup>C NMR spectrum (100 MHz, DMSO) of the triphenyltin(IV) chloride complex (5) with 3-Acetylamino-3(2-hydroxyphenyl) propanoic acid L<sub>1</sub>

DR. M. MAHBOOB / KHAWAR RAUF / Cyclohex<sub>3</sub>SnClAC2H\_13CNMR\_DMSO

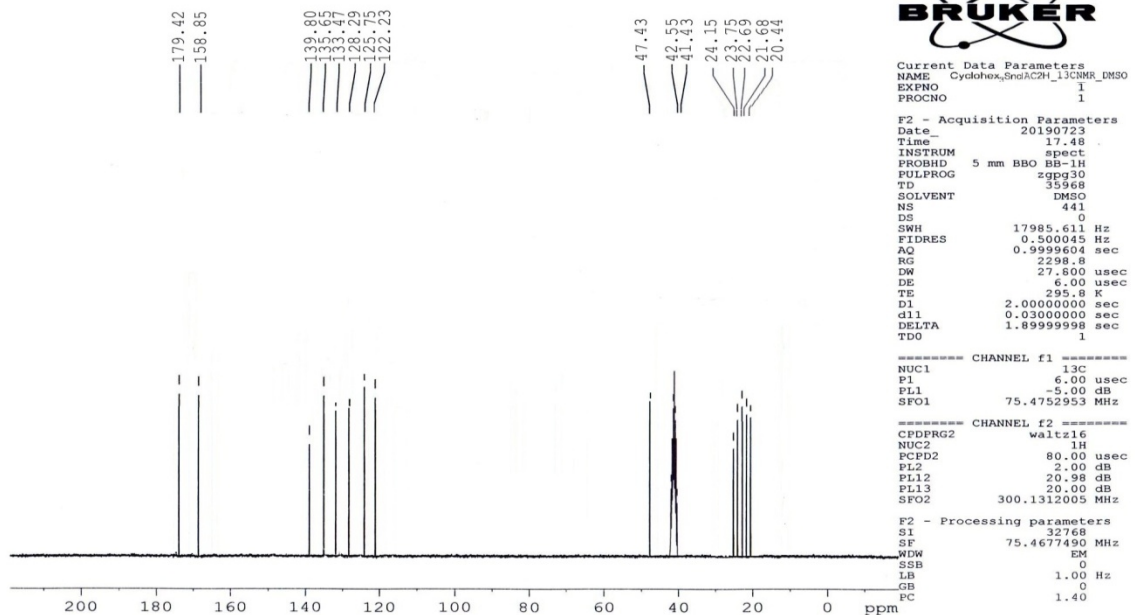

Fig. S54 <sup>13</sup>C NMR spectrum (100 MHz, DMSO) of the tricyclohexyltin(IV) chloride complex (6) with 3-Acetylamino-3(2-hydroxyphenyl) propanoic acid L<sub>1</sub>

DR. M. MAHBOOB / KHAWAR RAUF / BU<sub>2</sub>SnOAC2NM\_13CNMR\_DMSO

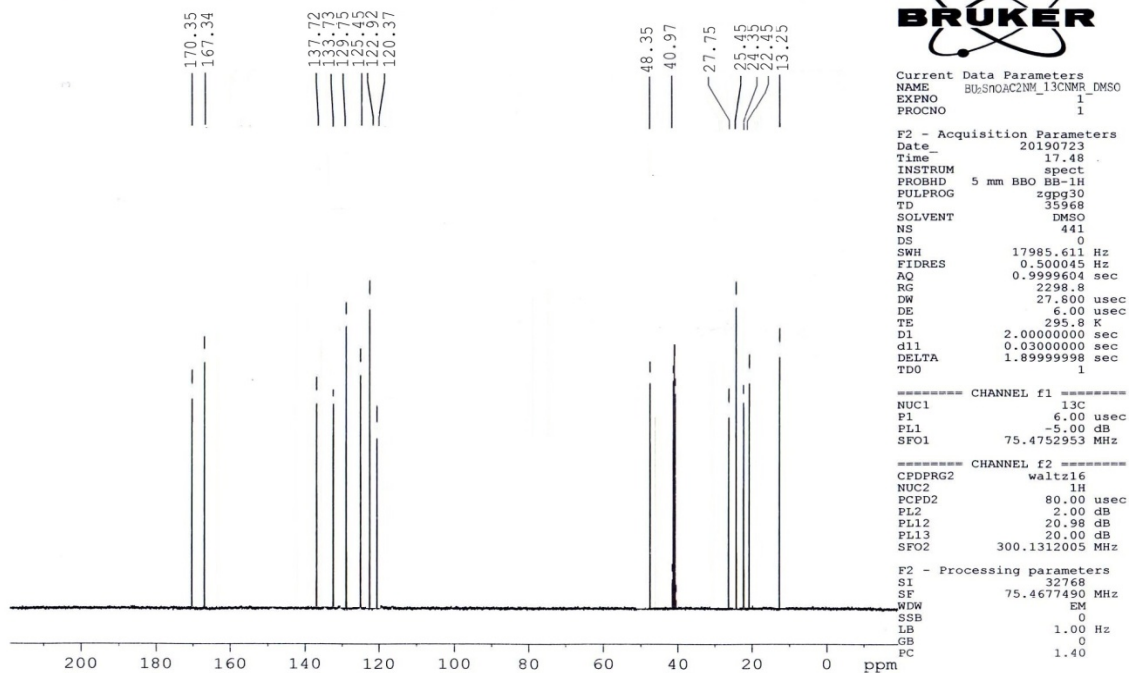

**Fig. S55** <sup>13</sup>C NMR spectrum (100 MHz, DMSO) of the dibutyltin(IV) oxide monomer complex (7) with 3-Acetylamino-3(2-nitrophenyl) propanoic acid L<sub>4</sub>

DR. M. MAHBOOB / KHAWAR RAUF / BU<sub>2</sub>SnOAC2ND\_13CNMR\_DMSO

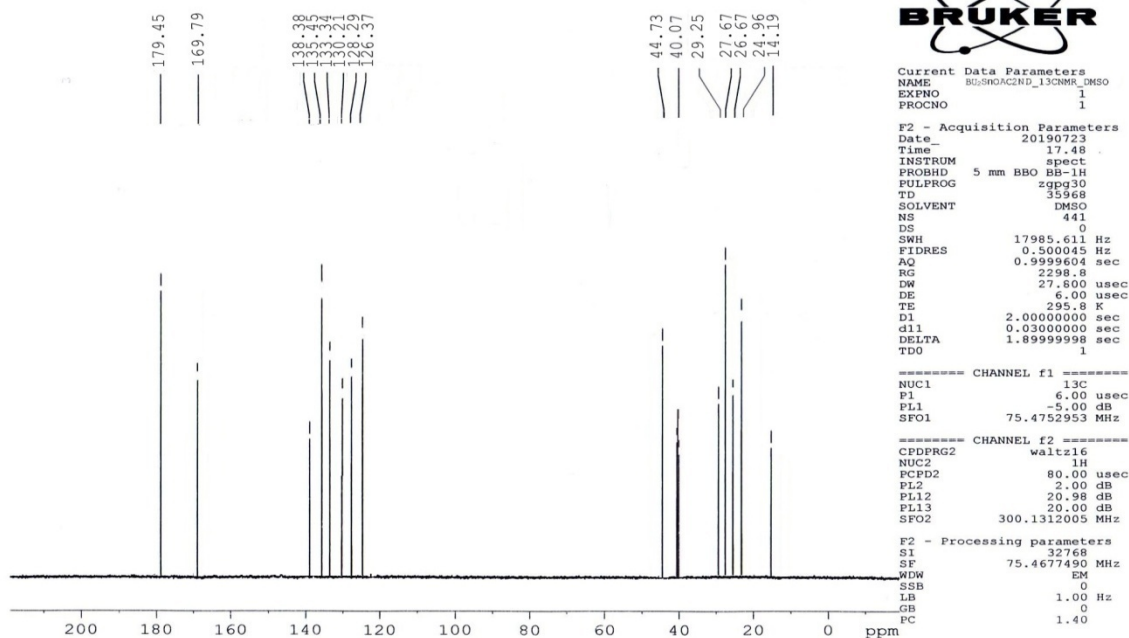

**Fig. S56** <sup>13</sup>C NMR spectrum (100 MHz, DMSO) of the dibutyltin(IV) oxide dimer complex (8) with 3-Acetylamino-3(2-nitrophenyl) propanoic acid L<sub>4</sub>

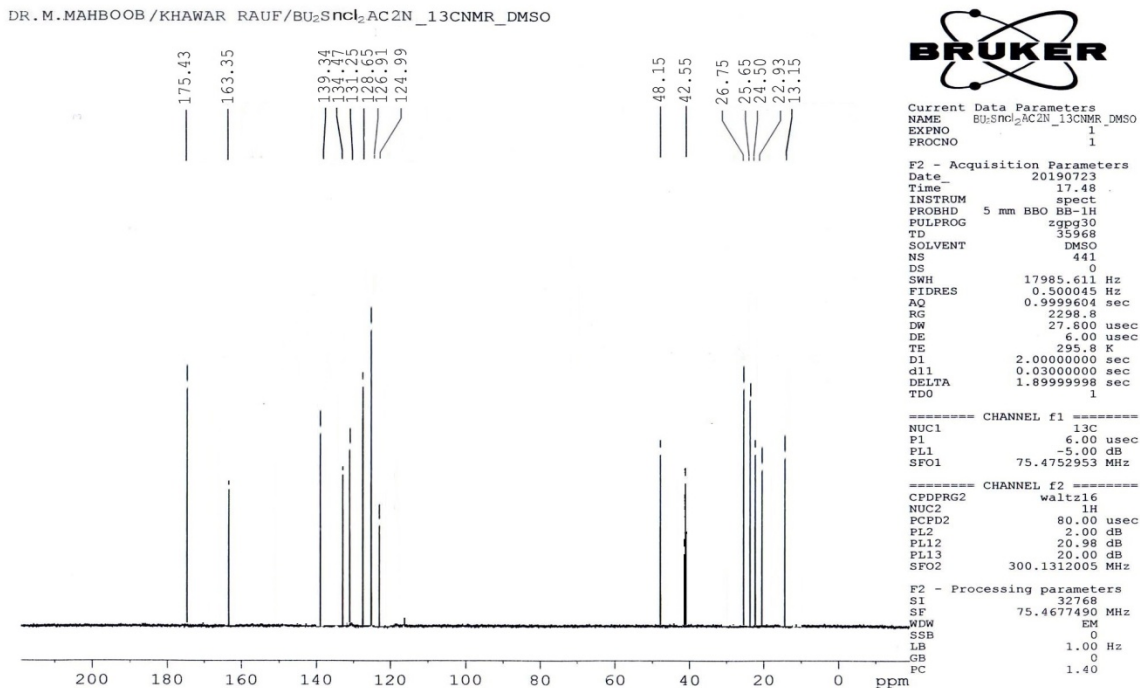

**Fig. S57** <sup>13</sup>C NMR spectrum (100 MHz, DMSO) of the dibutyltin(IV) dichloride complex (**9**) with 3-Acetylamino-3(2-nitrophenyl) propanoic acid **L<sub>4</sub>**

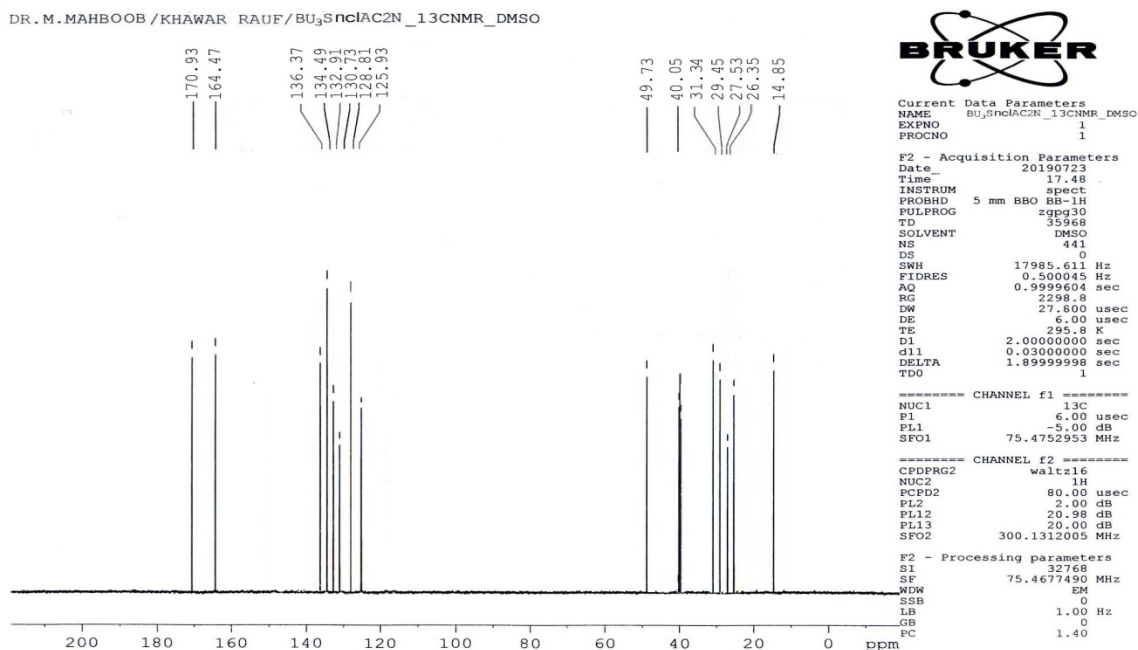

**Fig. S58** <sup>13</sup>C NMR spectrum (100 MHz, DMSO) of the tributyltin(IV) chloride complex (**10**) with 3-Acetylamino-3(2-nitrophenyl) propanoic acid **L<sub>4</sub>**

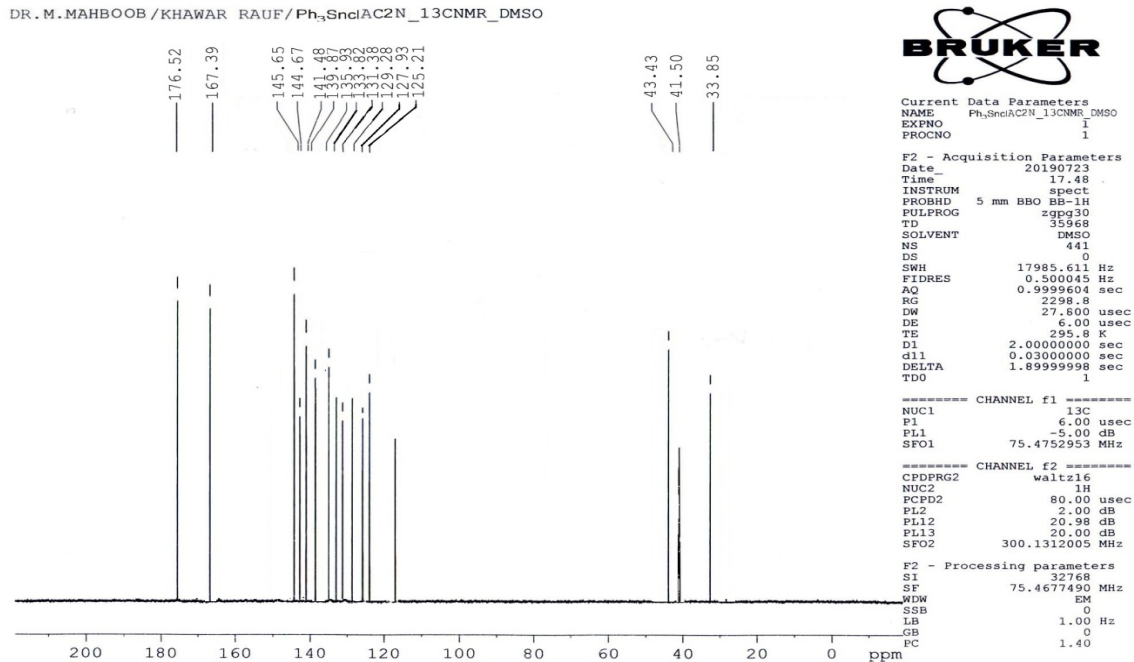

**Fig. S59** <sup>13</sup>C NMR spectrum (100 MHz, DMSO) of the triphenyltin(IV) chloride complex (**11**) with 3-Acetylamino-3(2-nitrophenyl) propanoic acid **L<sub>4</sub>**

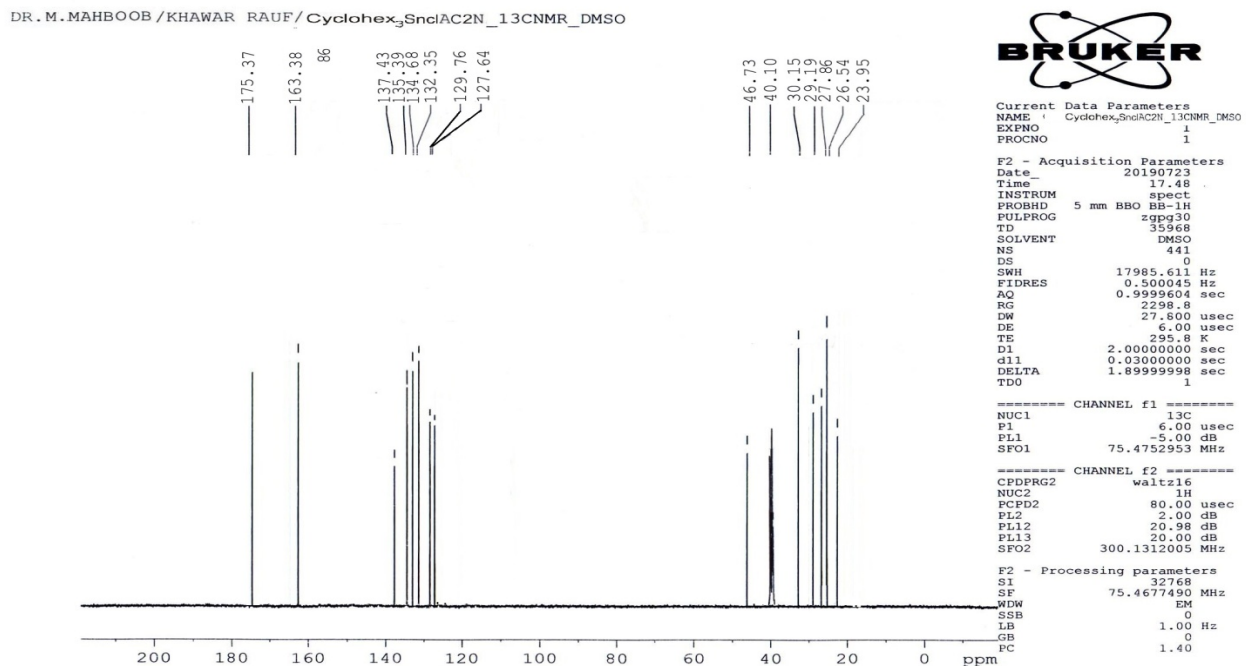

**Fig. S60** <sup>13</sup>C NMR spectrum (100 MHz, DMSO) of the tricyclohexyltin(IV) chloride complex (**12**) with 3-Acetylamino-3(2-nitrophenyl) propanoic acid **L<sub>4</sub>**

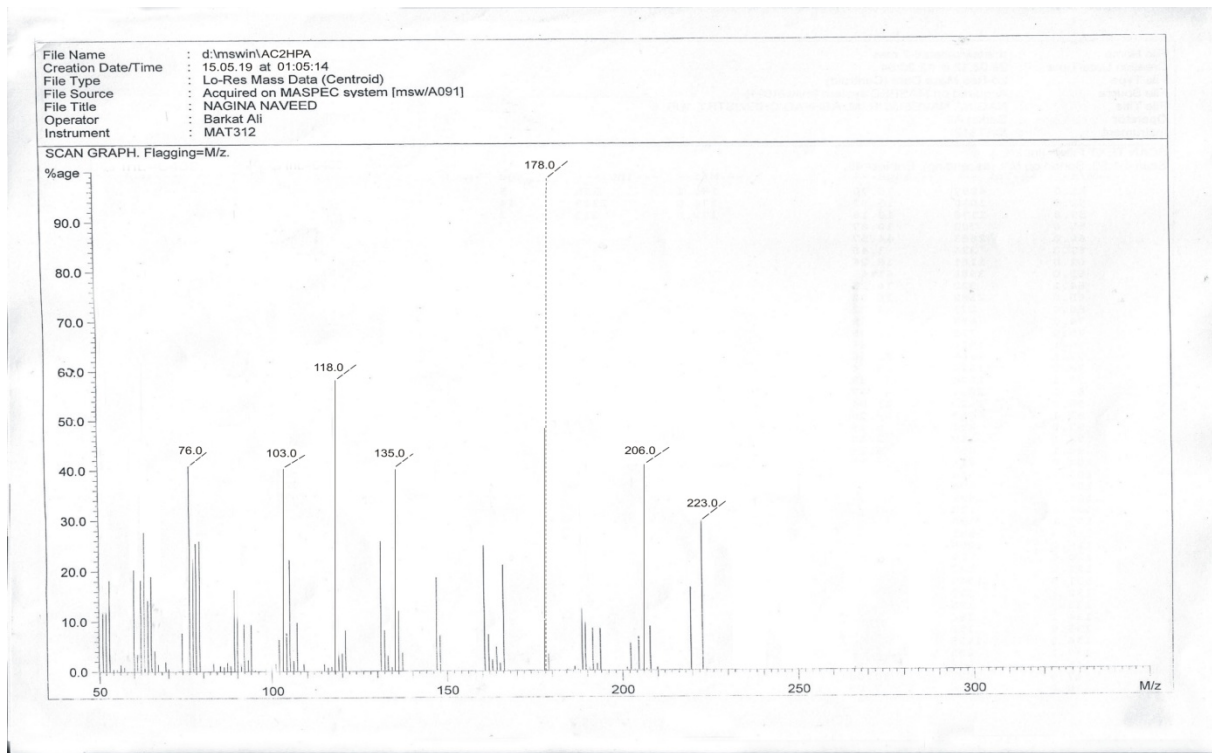

**g. S61** EI Mass spectrum of 3-Acetylamino-3(2-hydroxyphenyl) propanoic acid **L<sub>1</sub>**

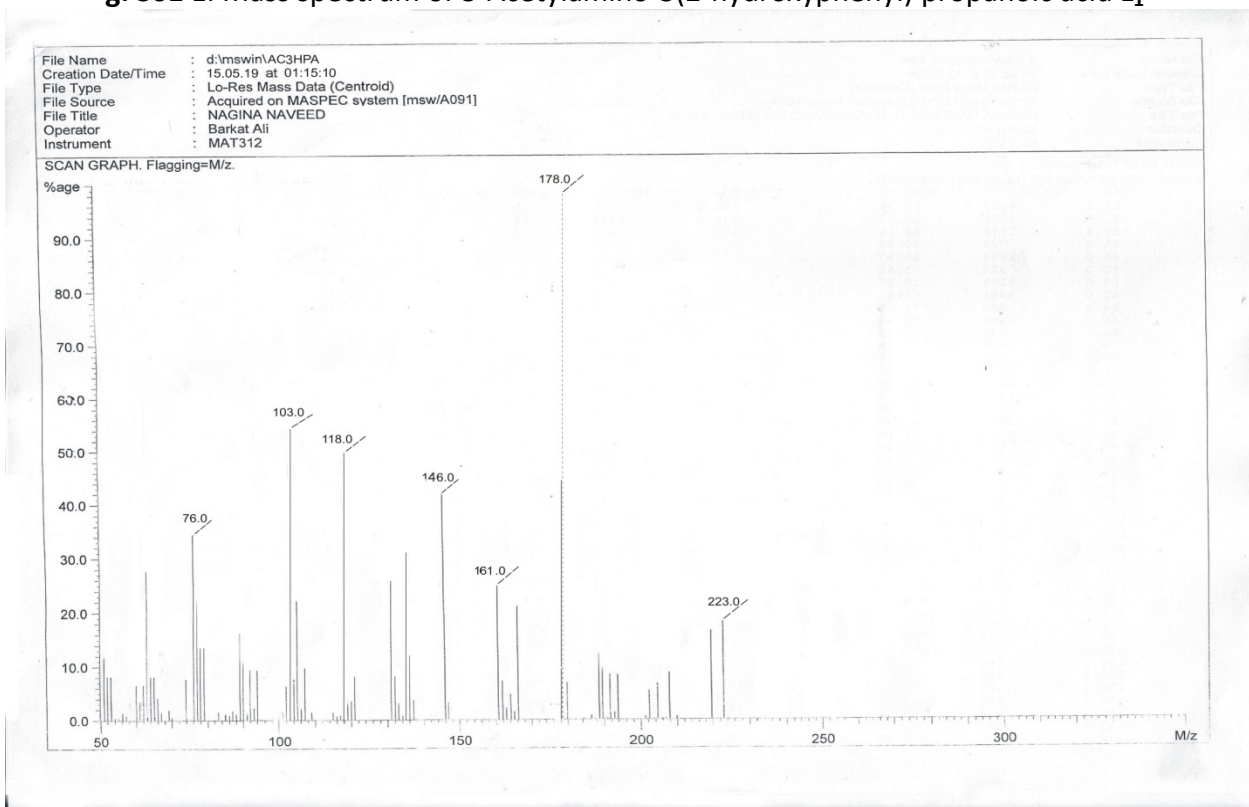

**Fig. S62** EI Mass spectrum of 3-Acetylamino-3(3-hydroxyphenyl) propanoic acid **L<sub>2</sub>**



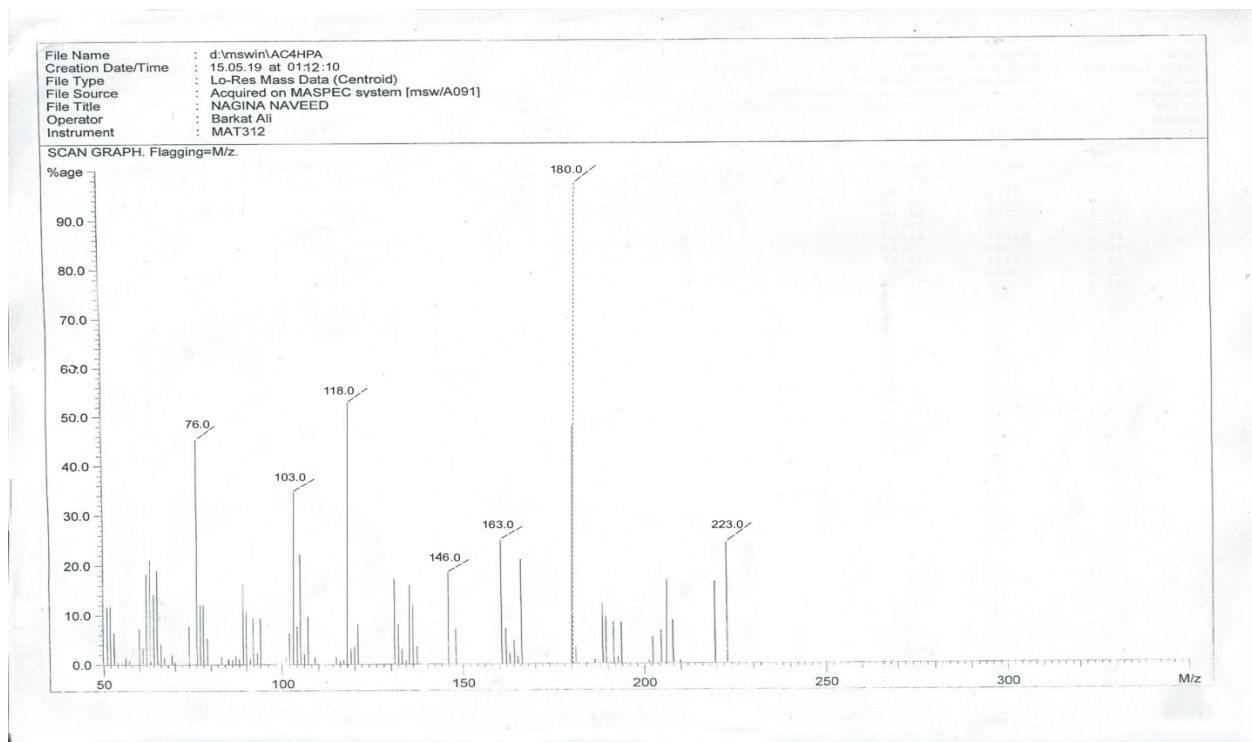

**Fig. S63** EI Mass spectrum of 3-Acetylamino-3(4-hydroxyphenyl) propanoic acid **L<sub>3</sub>**

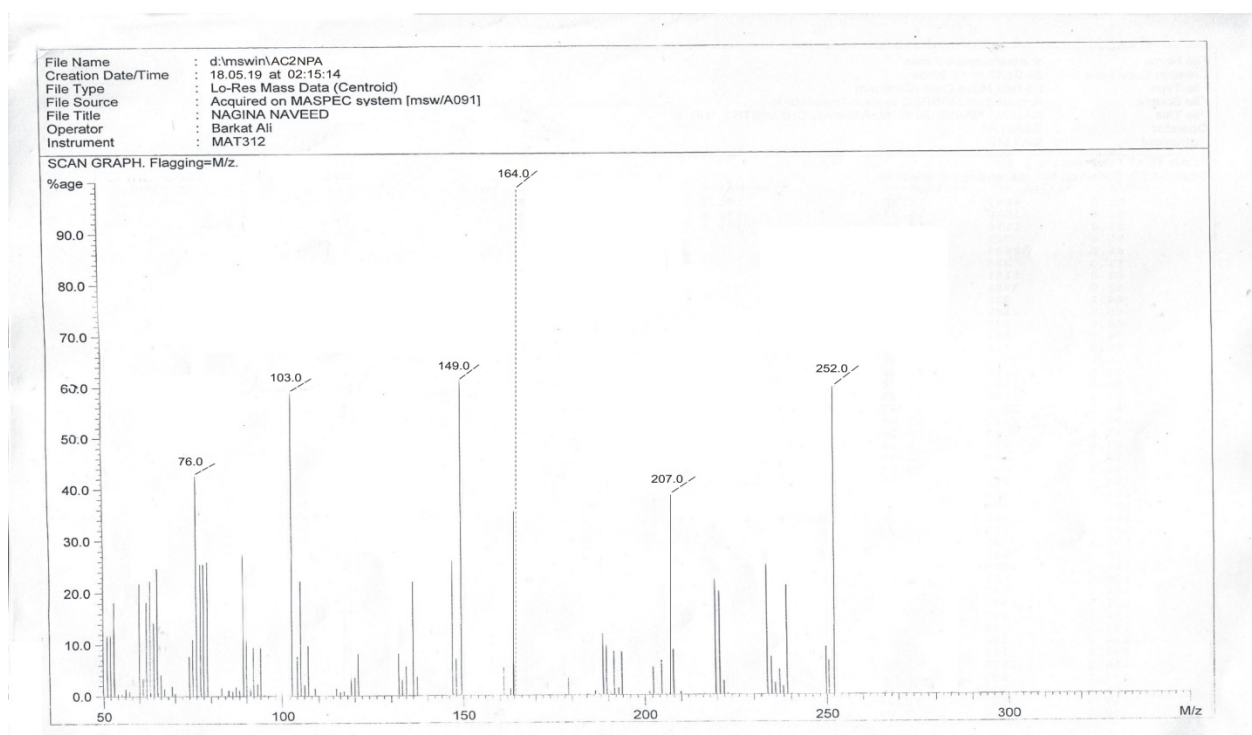

**Fig. S64** EI Mass spectrum of 3-Acetylamino-3(2-nitrophenyl) propanoic acid **L<sub>4</sub>**

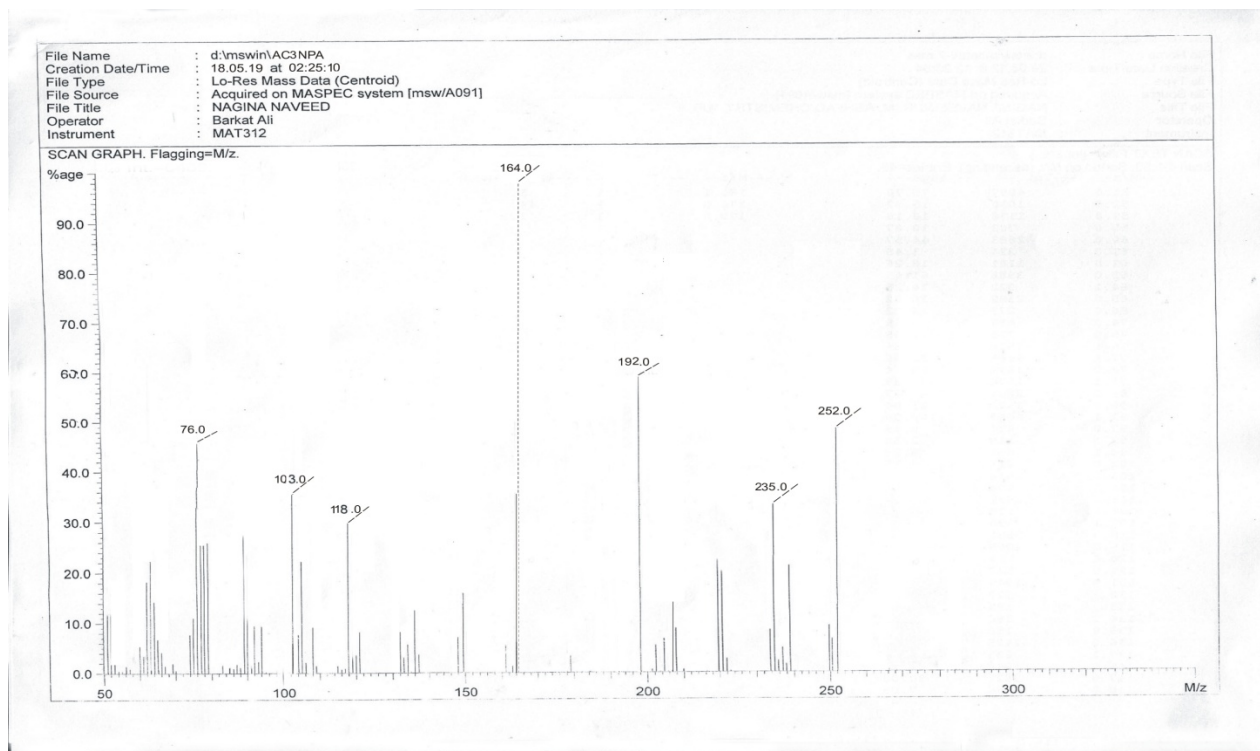

**Fig. S65** EI Mass spectrum of 3-Acetylamino-3(3-nitrophenyl) propanoic acid **L<sub>5</sub>**

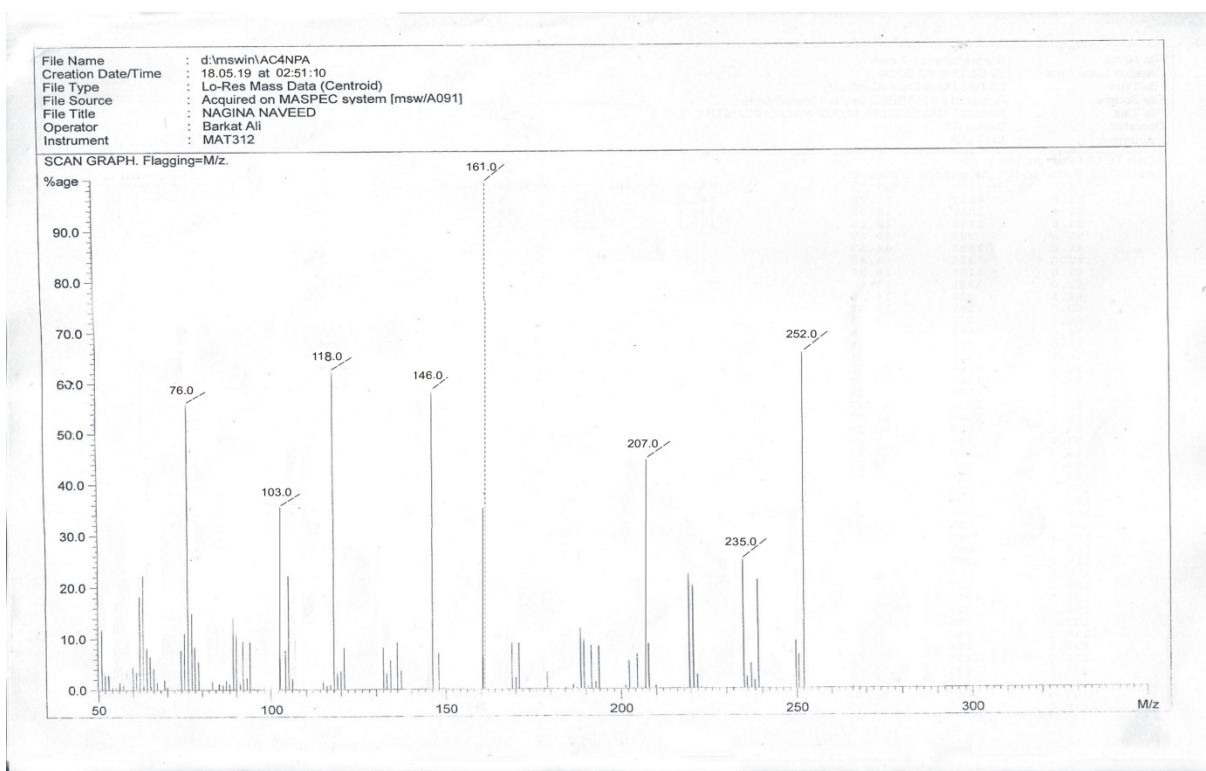

**Fig. S66** EI Mass spectrum of 3-Acetylamino-3(4-hydroxyphenyl) propanoic acid **L<sub>6</sub>**

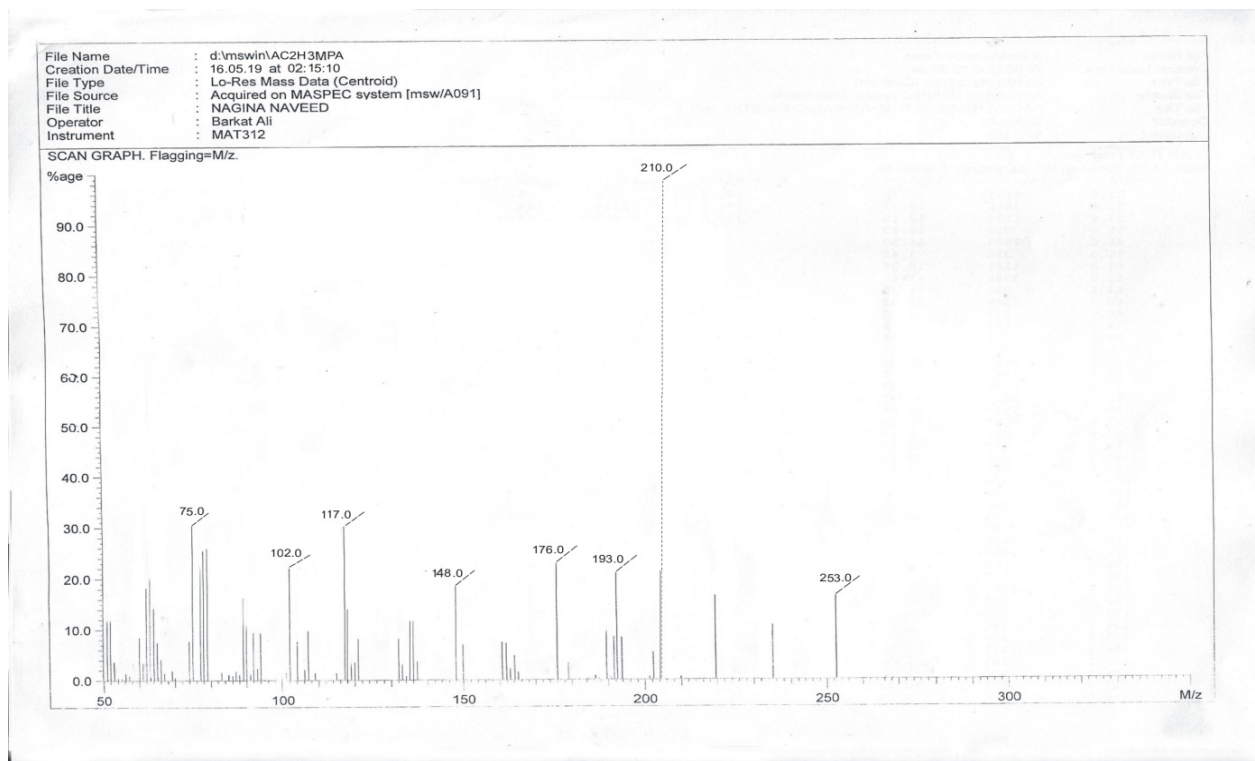

**Fig. S67** EI Mass spectrum of 3-Acetylamino-3(2-hydroxy-3-methoxyphenyl) propanoic acid **L<sub>7</sub>**

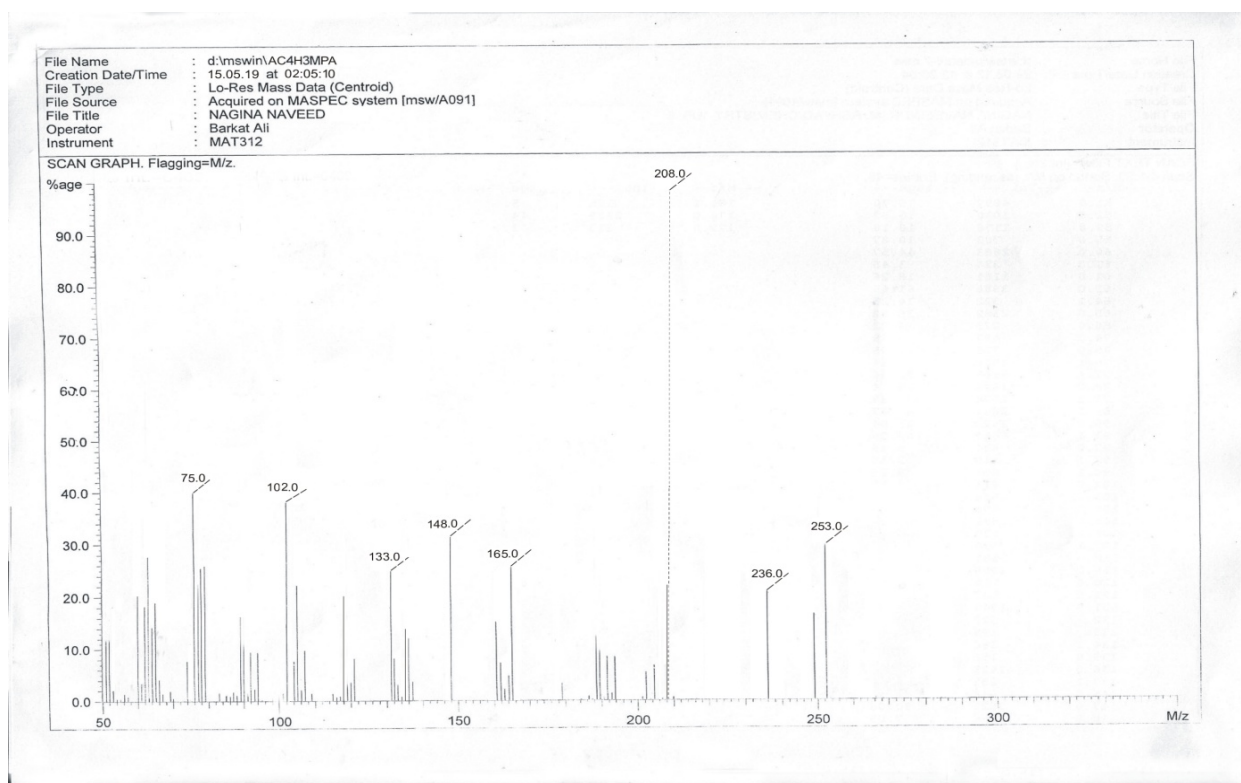

**Fig. S68** EI Mass spectrum of 3-Acetylamino-3(4-hydroxy-3-methoxyphenyl) propanoic acid **L<sub>8</sub>**

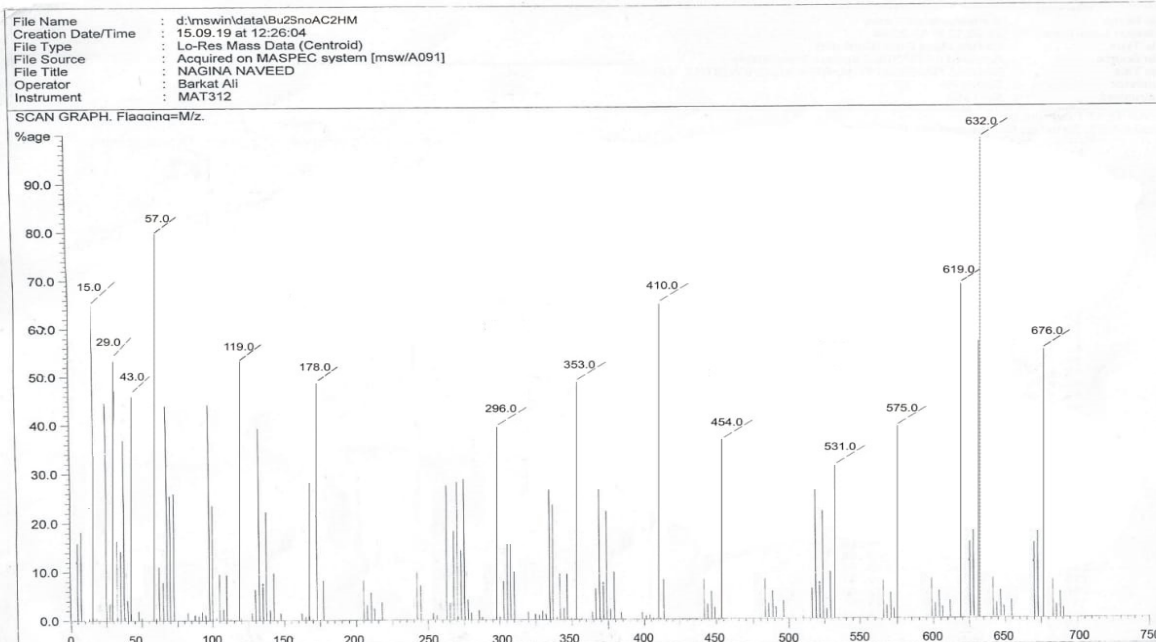

**Fig. S69** EI Mass spectrum of dibutyltin(IV) oxide monomer complex (1) with 3-Acetylamino-3(2-hydroxyphenyl) propanoic acid  $L_1$

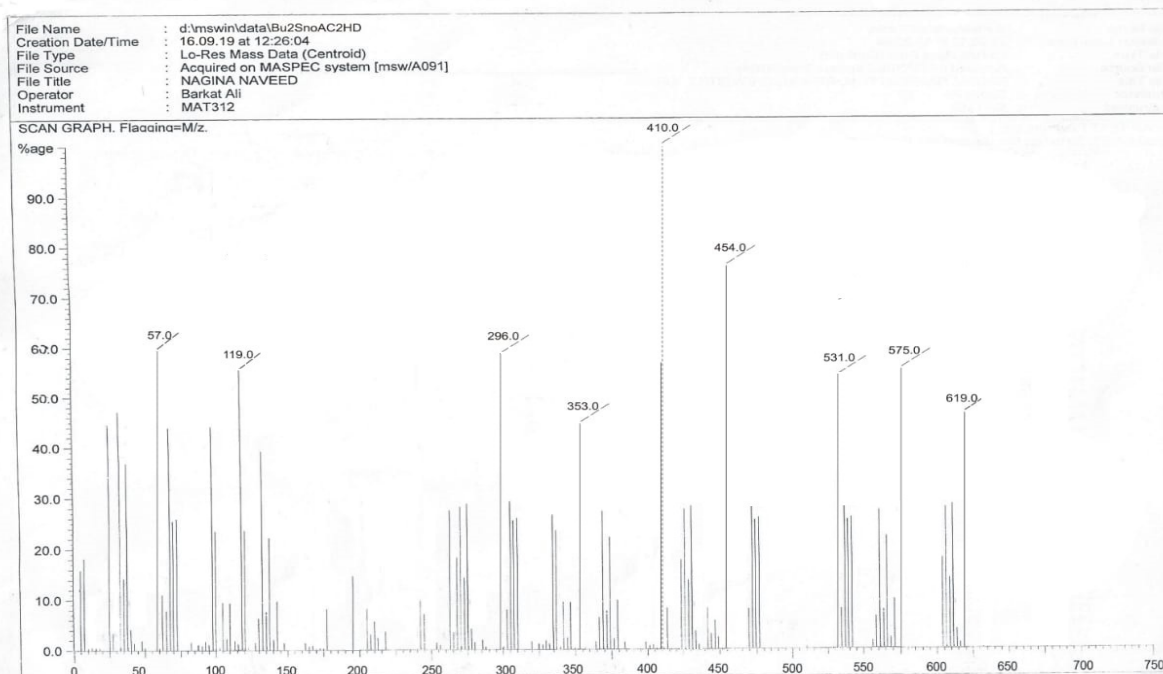

**Fig. S70** EI Mass spectrum of dibutyltin(IV) oxide dimer complex (2) with 3-Acetylamino-3(2-hydroxyphenyl) propanoic acid  $L_1$

File Name : d:\mswin\data\Bu2Sncl2AC2H  
Creation Date/Time : 16.09.19 at 10:22:04  
File Type : Lo-Res Mass Data (Centroid)  
File Source : Acquired on MASPEC system [msw/A091]  
File Title : NAGINA NAVEED  
Operator : Barkat Ali  
Instrument : MAT312

SCAN GRAPH. Flaccino=M/z.

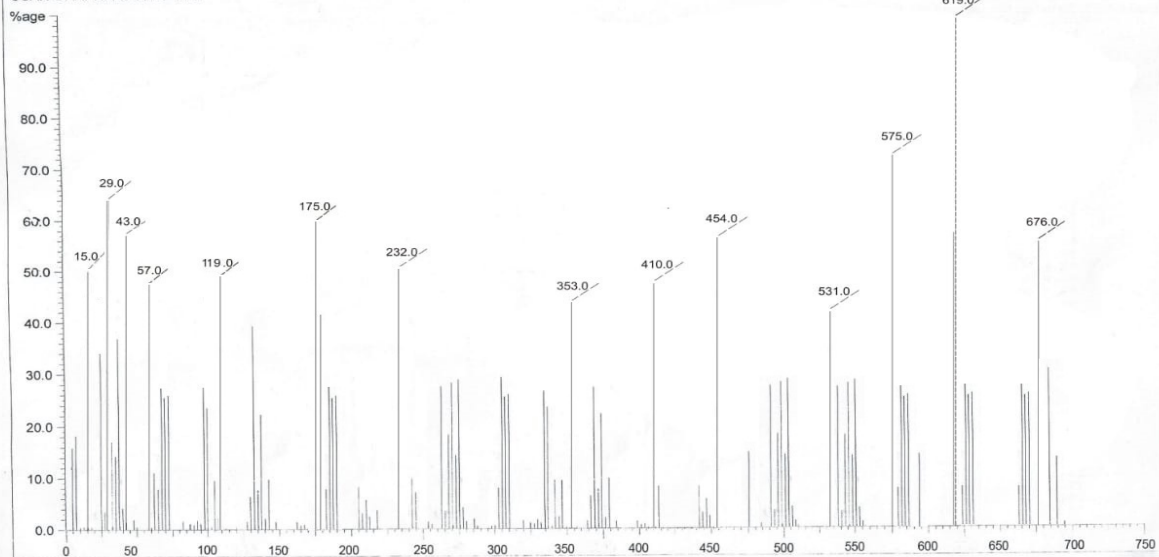

**Fig. S71** EI Mass spectrum of dibutyltin(IV) dichloride complex (**3**) with 3-Acetylamino-3(2-hydroxyphenyl) propanoic acid **L<sub>1</sub>**

File Name : d:\mswin\data\Bu3SnclAC2H  
Creation Date/Time : 16.09.19 at 01:54:09  
File Type : Lo-Res Mass Data (Centroid)  
File Source : Acquired on MASPEC system [msw/A091]  
File Title : NAGINA NAVEED  
Operator : Barkat Ali  
Instrument : MAT312

SCAN GRAPH. Flaccino=M/z.

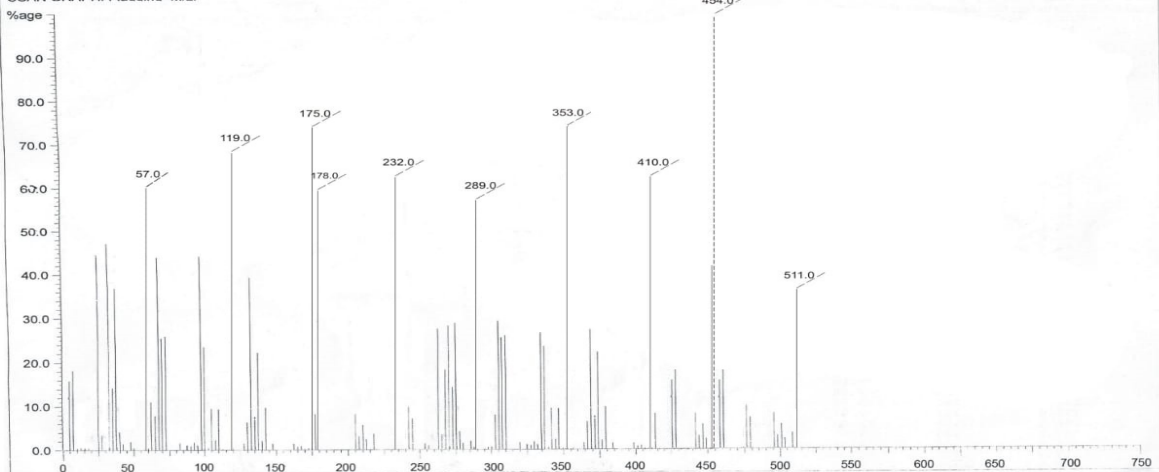

**Fig. S72** EI Mass spectrum of tributyltin(IV) chloride complex (**4**) with 3-Acetylamino-3(2-hydroxyphenyl) propanoic acid **L<sub>1</sub>**

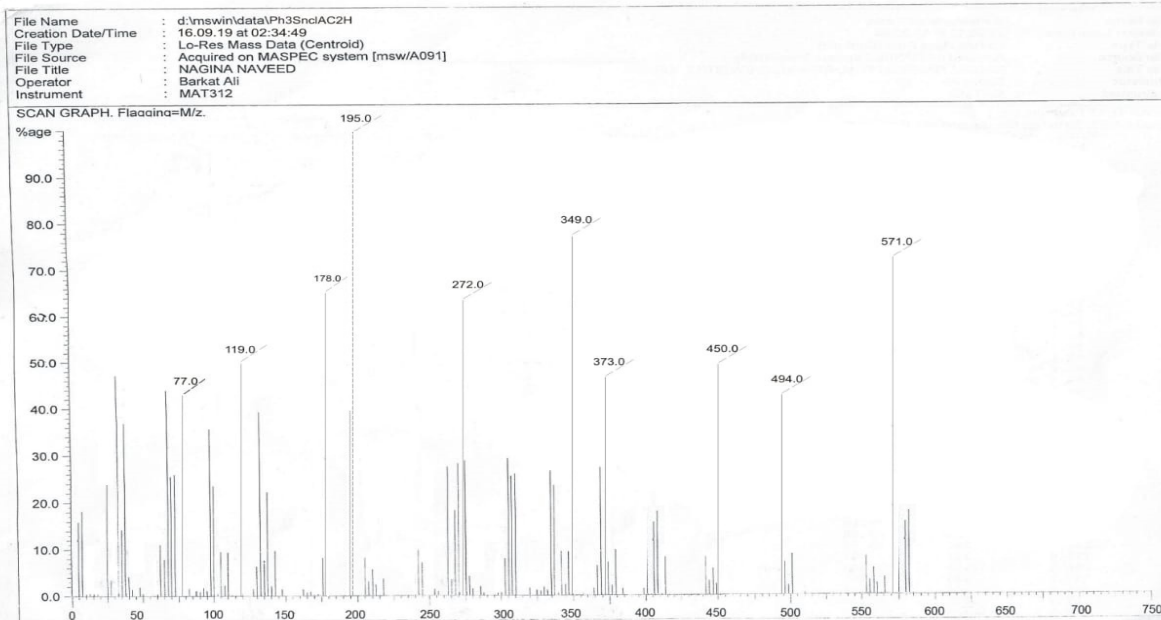

**Fig. S73** EI Mass spectrum of triphenyltin(IV) chloride complex (5) with 3-Acetylamino-3(2-hydroxyphenyl) propanoic acid  $L_1$

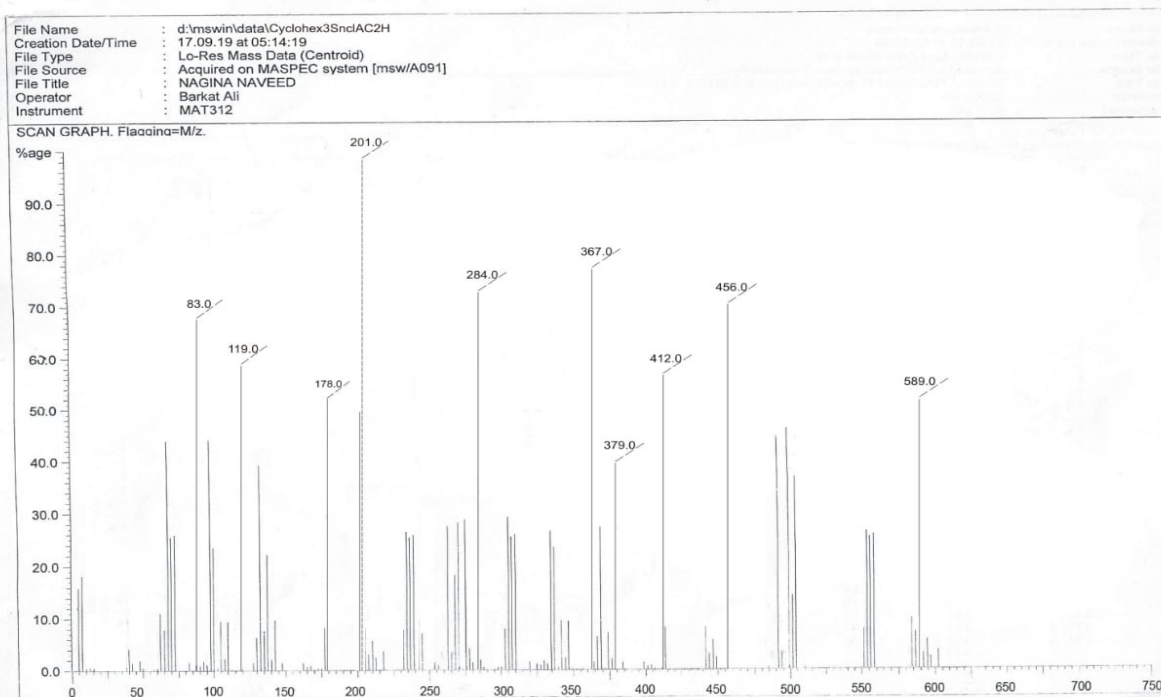

**Fig. S74** EI Mass spectrum of tricyclohexyltin(IV) chloride complex (6) with 3-Acetylamino-3(2-hydroxyphenyl) propanoic acid  $L_1$

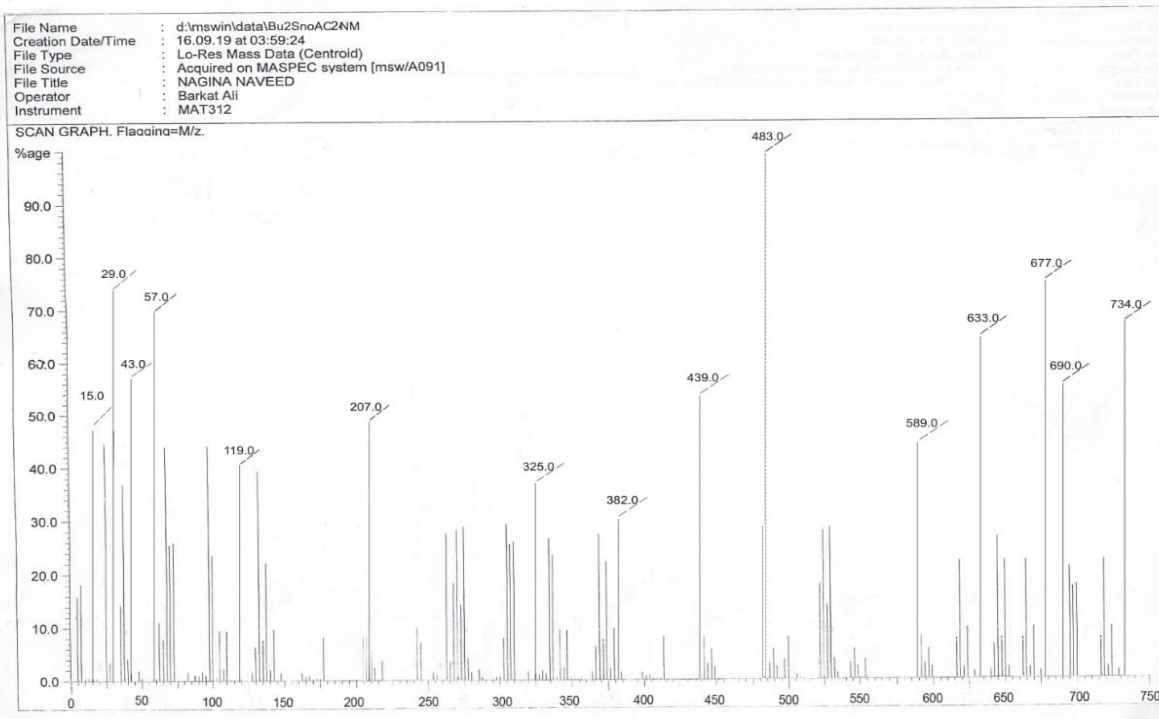

**Fig. S75** EI Mass spectrum of dibutyltin(IV) oxide monomer complex (**7**) with 3-Acetylamino-3(2-nitrophenyl) propanoic acid  $L_4$

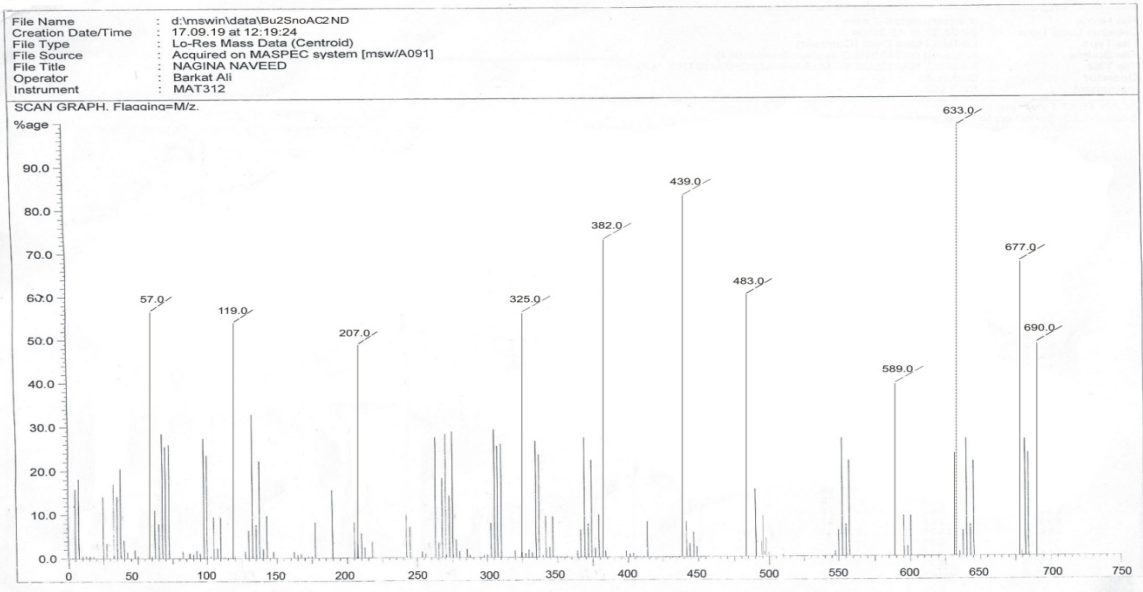

**Fi**

**g. S76** EI Mass spectrum of dibutyltin(IV) oxide dimer complex (**8**) with 3-Acetylamino-3(2-nitrophenyl) propanoic acid  $L_4$

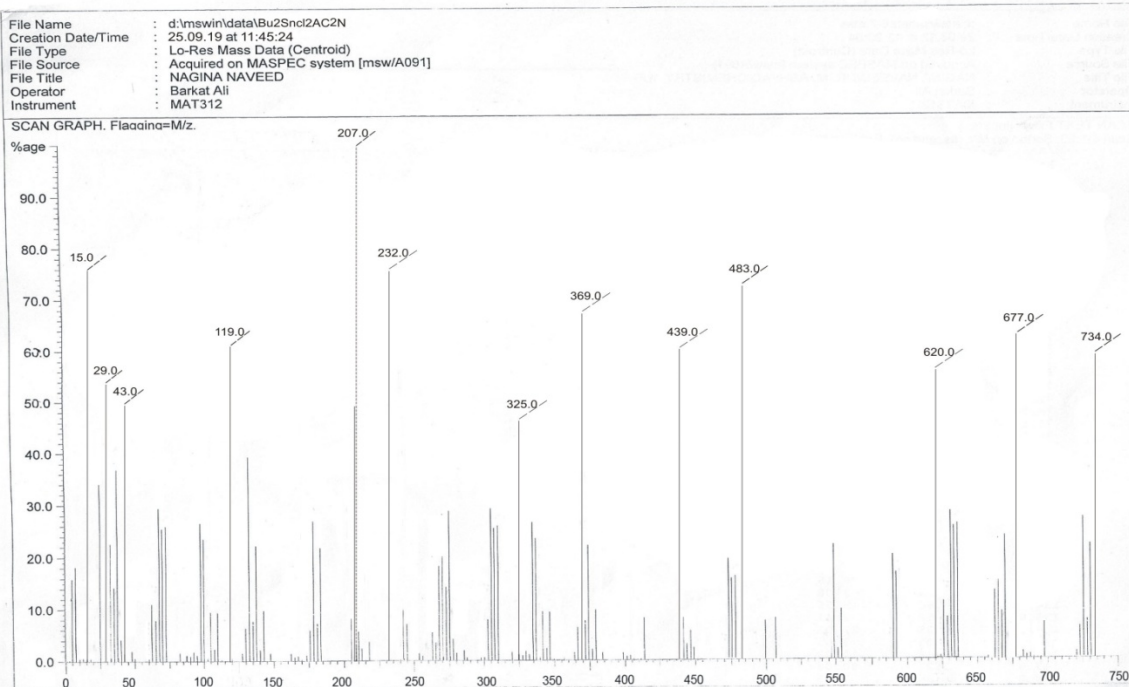

Fi

**g. S77** EI Mass spectrum of dibutyltin(IV) dichloride complex (**9**) with 3-Acetylamino-3(2-nitrophenyl) propanoic acid **L<sub>4</sub>**

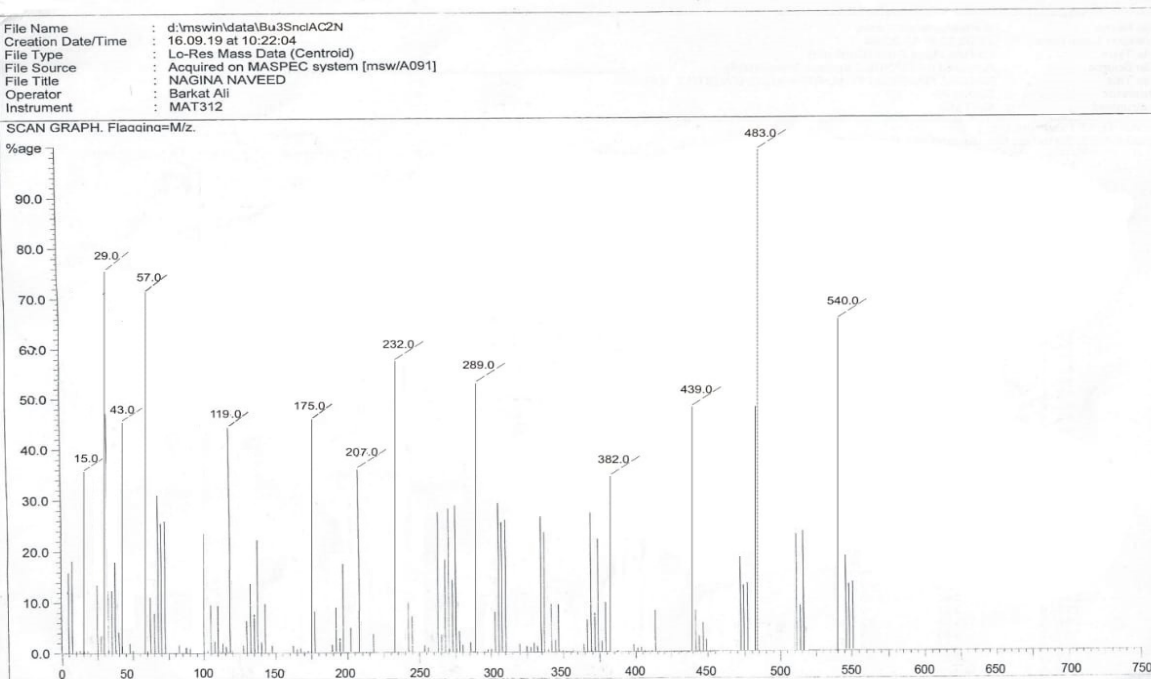

**Fig. S78** EI Mass spectrum of tributyltin(IV) chloride complex (**10**) with 3-Acetylamino-3(2-



nitrophenyl) propanoic acid **L<sub>4</sub>**

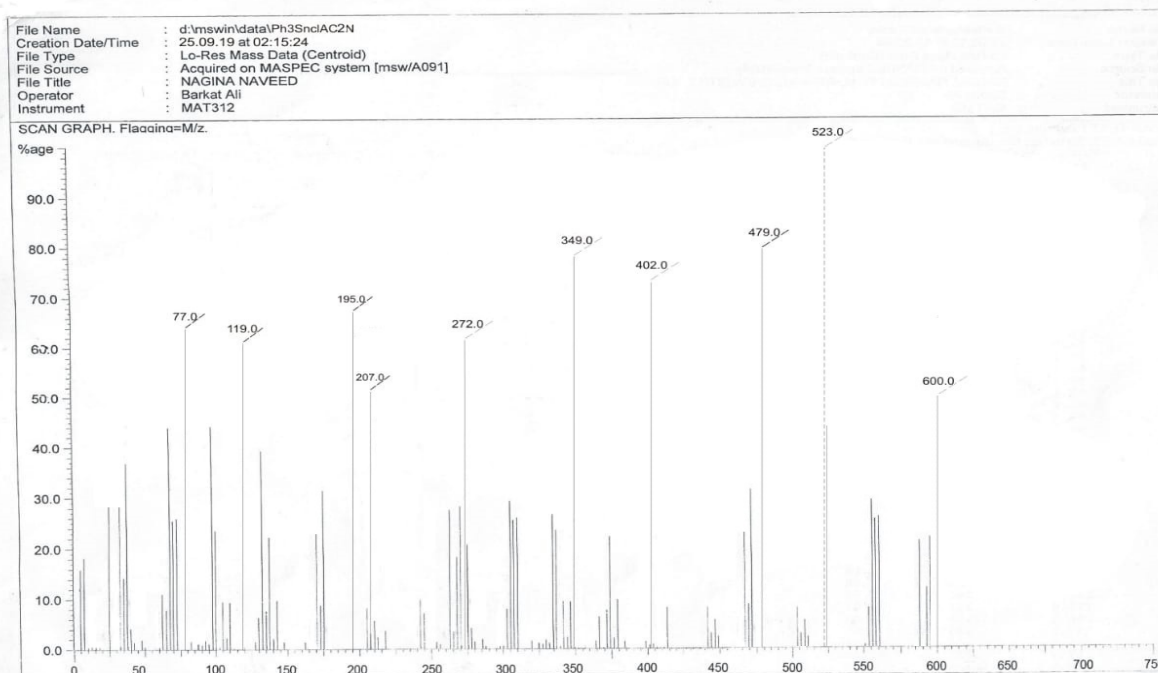

**Fig. S79** EI Mass spectrum of triphenyltin(IV) chloride complex (**11**) with 3-Acetylamino-3(2-nitrophenyl) propanoic acid **L<sub>4</sub>**

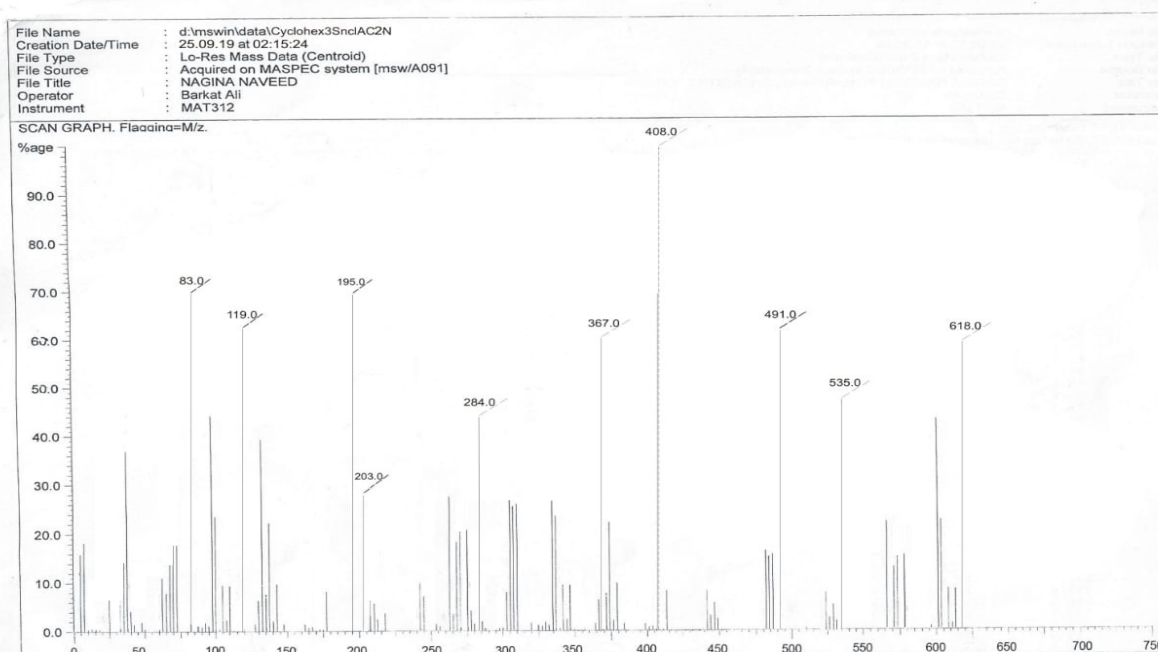

**Fig. S80** EI Mass spectrum of tricyclohexyltin(IV) chloride complex (**12**) with 3-Acetylamino-3(2-

nitrophenyl) propanoic acid L<sub>4</sub>
